# Supplementary material for: Convergent access to bis-1,2,4-triazinyl-2,2′-bipyridines (BTBPs) and 2,2′-bipyridines via a Pd-catalyzed Ullman-type reaction
Source: Royal Society of Chemistry journal article supplement (doi:10.1039/d0ra00673d), 2020-01-01
Supplement: d0ra00673d1.pdf [file d0ra00673d1.pdf]

# Convergent Synthesis of Bis-1,2,4-triazinyl-2,2'-bipyridines (BTBPs) and Related Congeners via a Pd-catalyzed Ullman-type Reaction

## Supporting Information

Gabrielle D. Waters and Jesse D. Carrick\*

Department of Chemistry, Tennessee Tech University, 55 University Drive, Cookeville,  
TN 38505-0001

| <b><u>Table of Contents</u></b>                           | <b>S1</b>  |
|-----------------------------------------------------------|------------|
| <b>Figure S1.</b> Compound <b>10</b> <sup>1</sup> H NMR   | <b>S2</b>  |
| <b>Figure S2.</b> Compound <b>10</b> <sup>13</sup> C NMR  | <b>S3</b>  |
| <b>Figure S3.</b> Compound <b>11</b> <sup>1</sup> H NMR   | <b>S4</b>  |
| <b>Figure S4.</b> Compound <b>11</b> <sup>13</sup> C NMR  | <b>S5</b>  |
| <b>Figure S5.</b> Compound <b>12</b> <sup>1</sup> H NMR   | <b>S6</b>  |
| <b>Figure S6.</b> Compound <b>12</b> <sup>13</sup> C NMR  | <b>S7</b>  |
| <b>Figure S7.</b> Compound <b>13</b> <sup>1</sup> H NMR   | <b>S8</b>  |
| <b>Figure S8.</b> Compound <b>13</b> <sup>13</sup> C NMR  | <b>S9</b>  |
| <b>Figure S9.</b> Compound <b>14</b> <sup>1</sup> H NMR   | <b>S10</b> |
| <b>Figure S10.</b> Compound <b>14</b> <sup>13</sup> C NMR | <b>S11</b> |
| <b>Figure S11.</b> Compound <b>15</b> <sup>1</sup> H NMR  | <b>S12</b> |
| <b>Figure S12.</b> Compound <b>15</b> <sup>13</sup> C NMR | <b>S13</b> |
| <b>Figure S13.</b> Chromatogram of <b>10</b>              | <b>S14</b> |
| <b>Figure S14.</b> Chromatogram of <b>11</b>              | <b>S15</b> |
| <b>Figure S15.</b> Chromatogram of <b>12</b>              | <b>S16</b> |
| <b>Figure S16.</b> Chromatogram of <b>13</b>              | <b>S17</b> |
| <b>Figure S17.</b> Chromatogram of <b>14</b>              | <b>S18</b> |
| <b>Figure S18.</b> Chromatogram of <b>15</b>              | <b>S19</b> |

**Figure S1.**  $^1\text{H}$  NMR Spectrum of Compound **10** ( $\text{CDCl}_3$ )

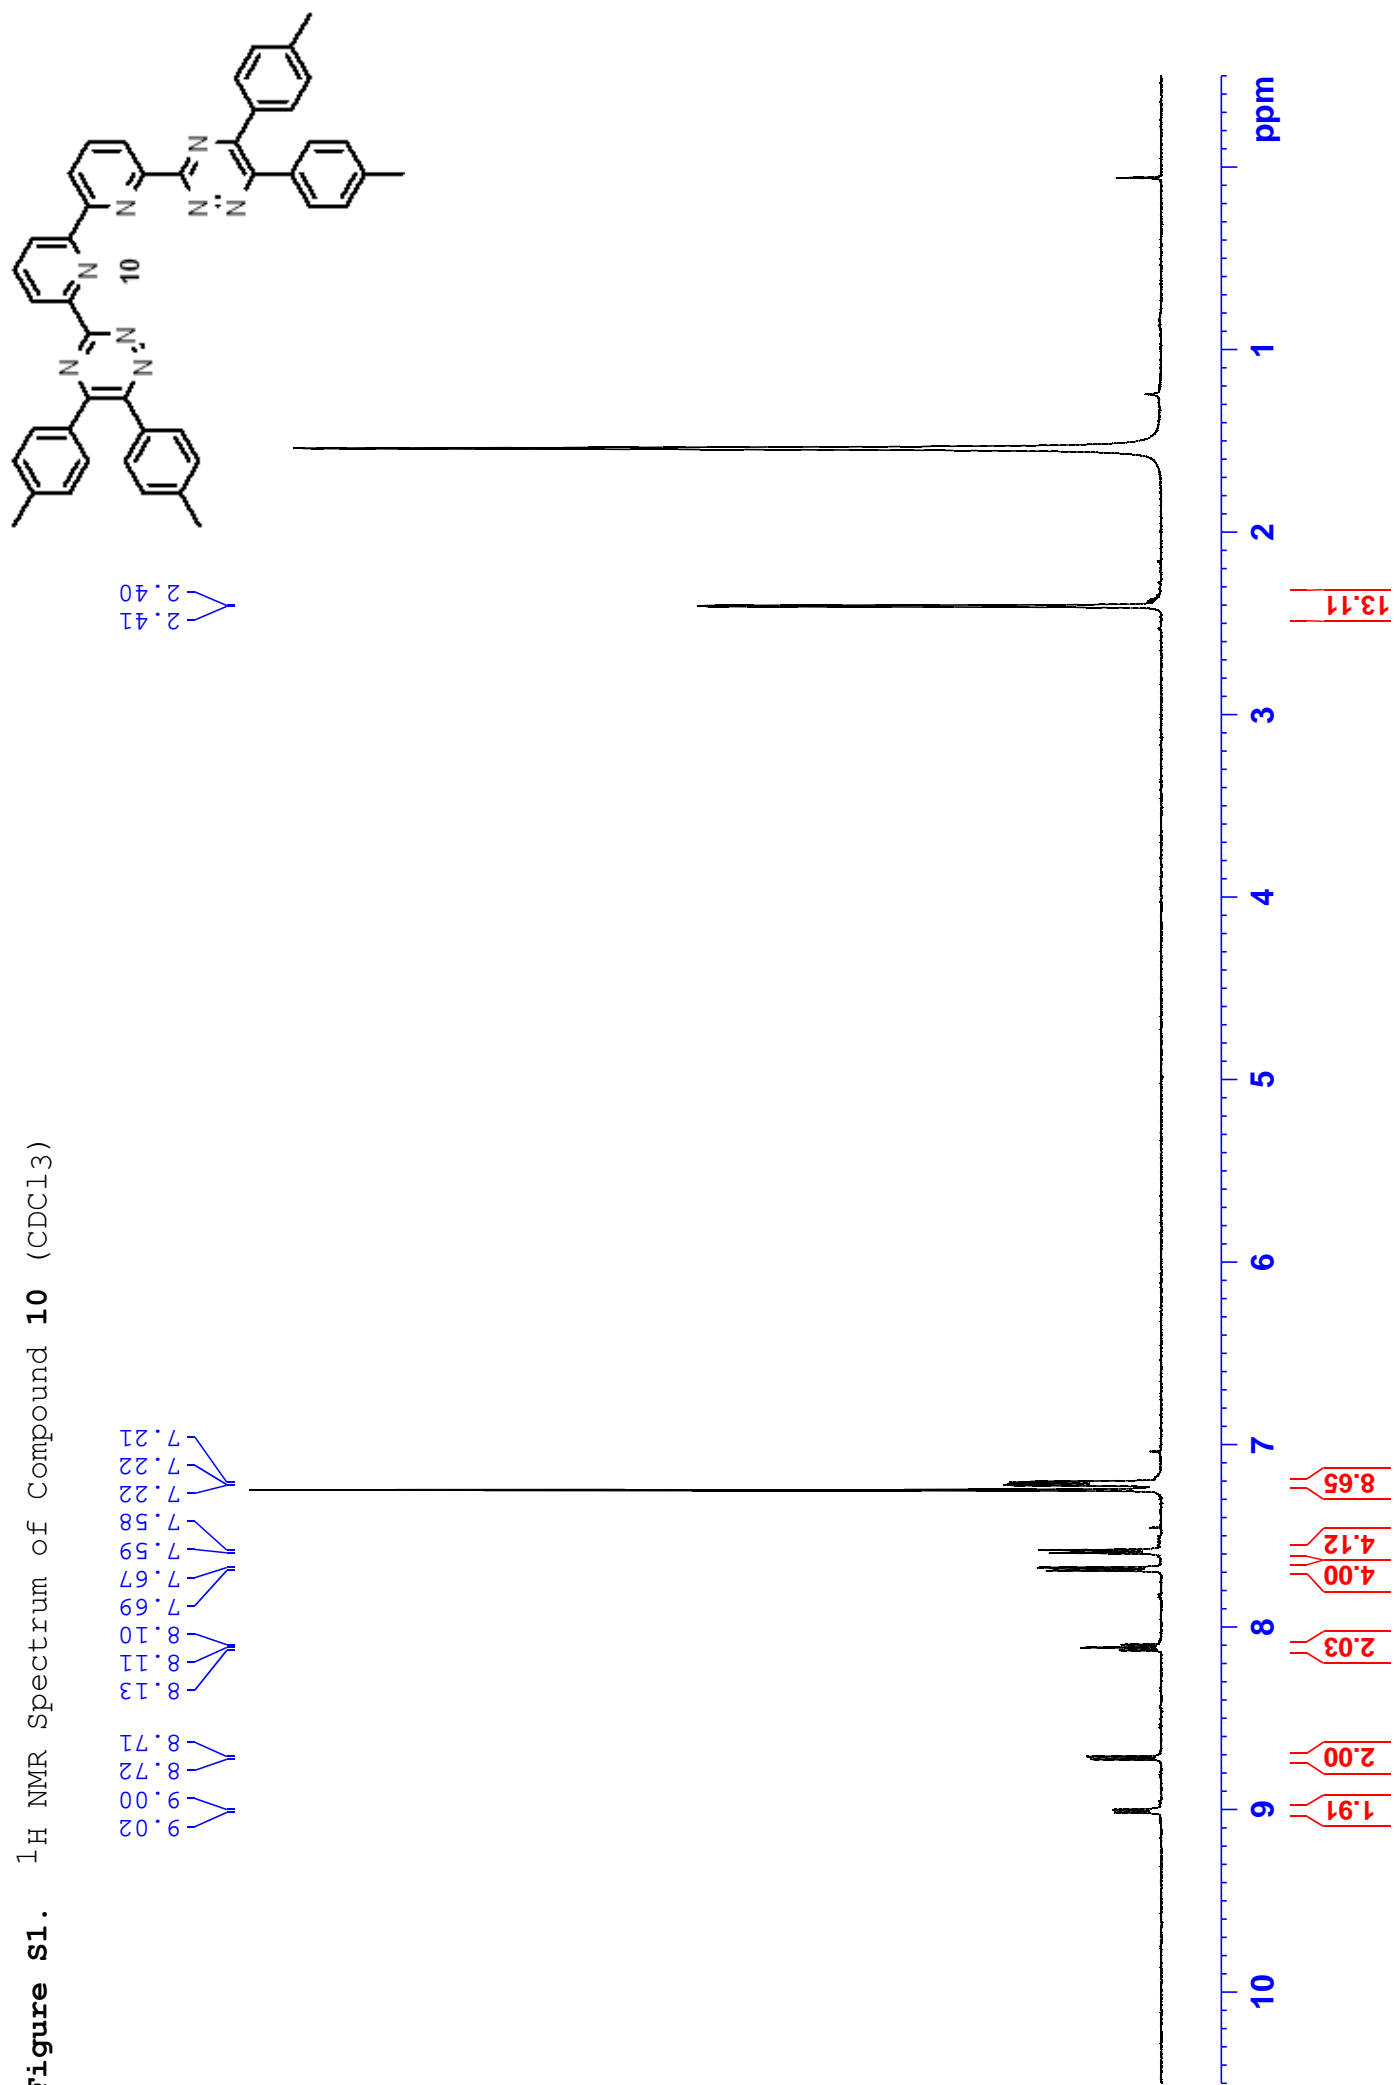

Figure S2.  $^{13}\text{C}$  NMR of Compound **10** ( $\text{CDCl}_3$ )

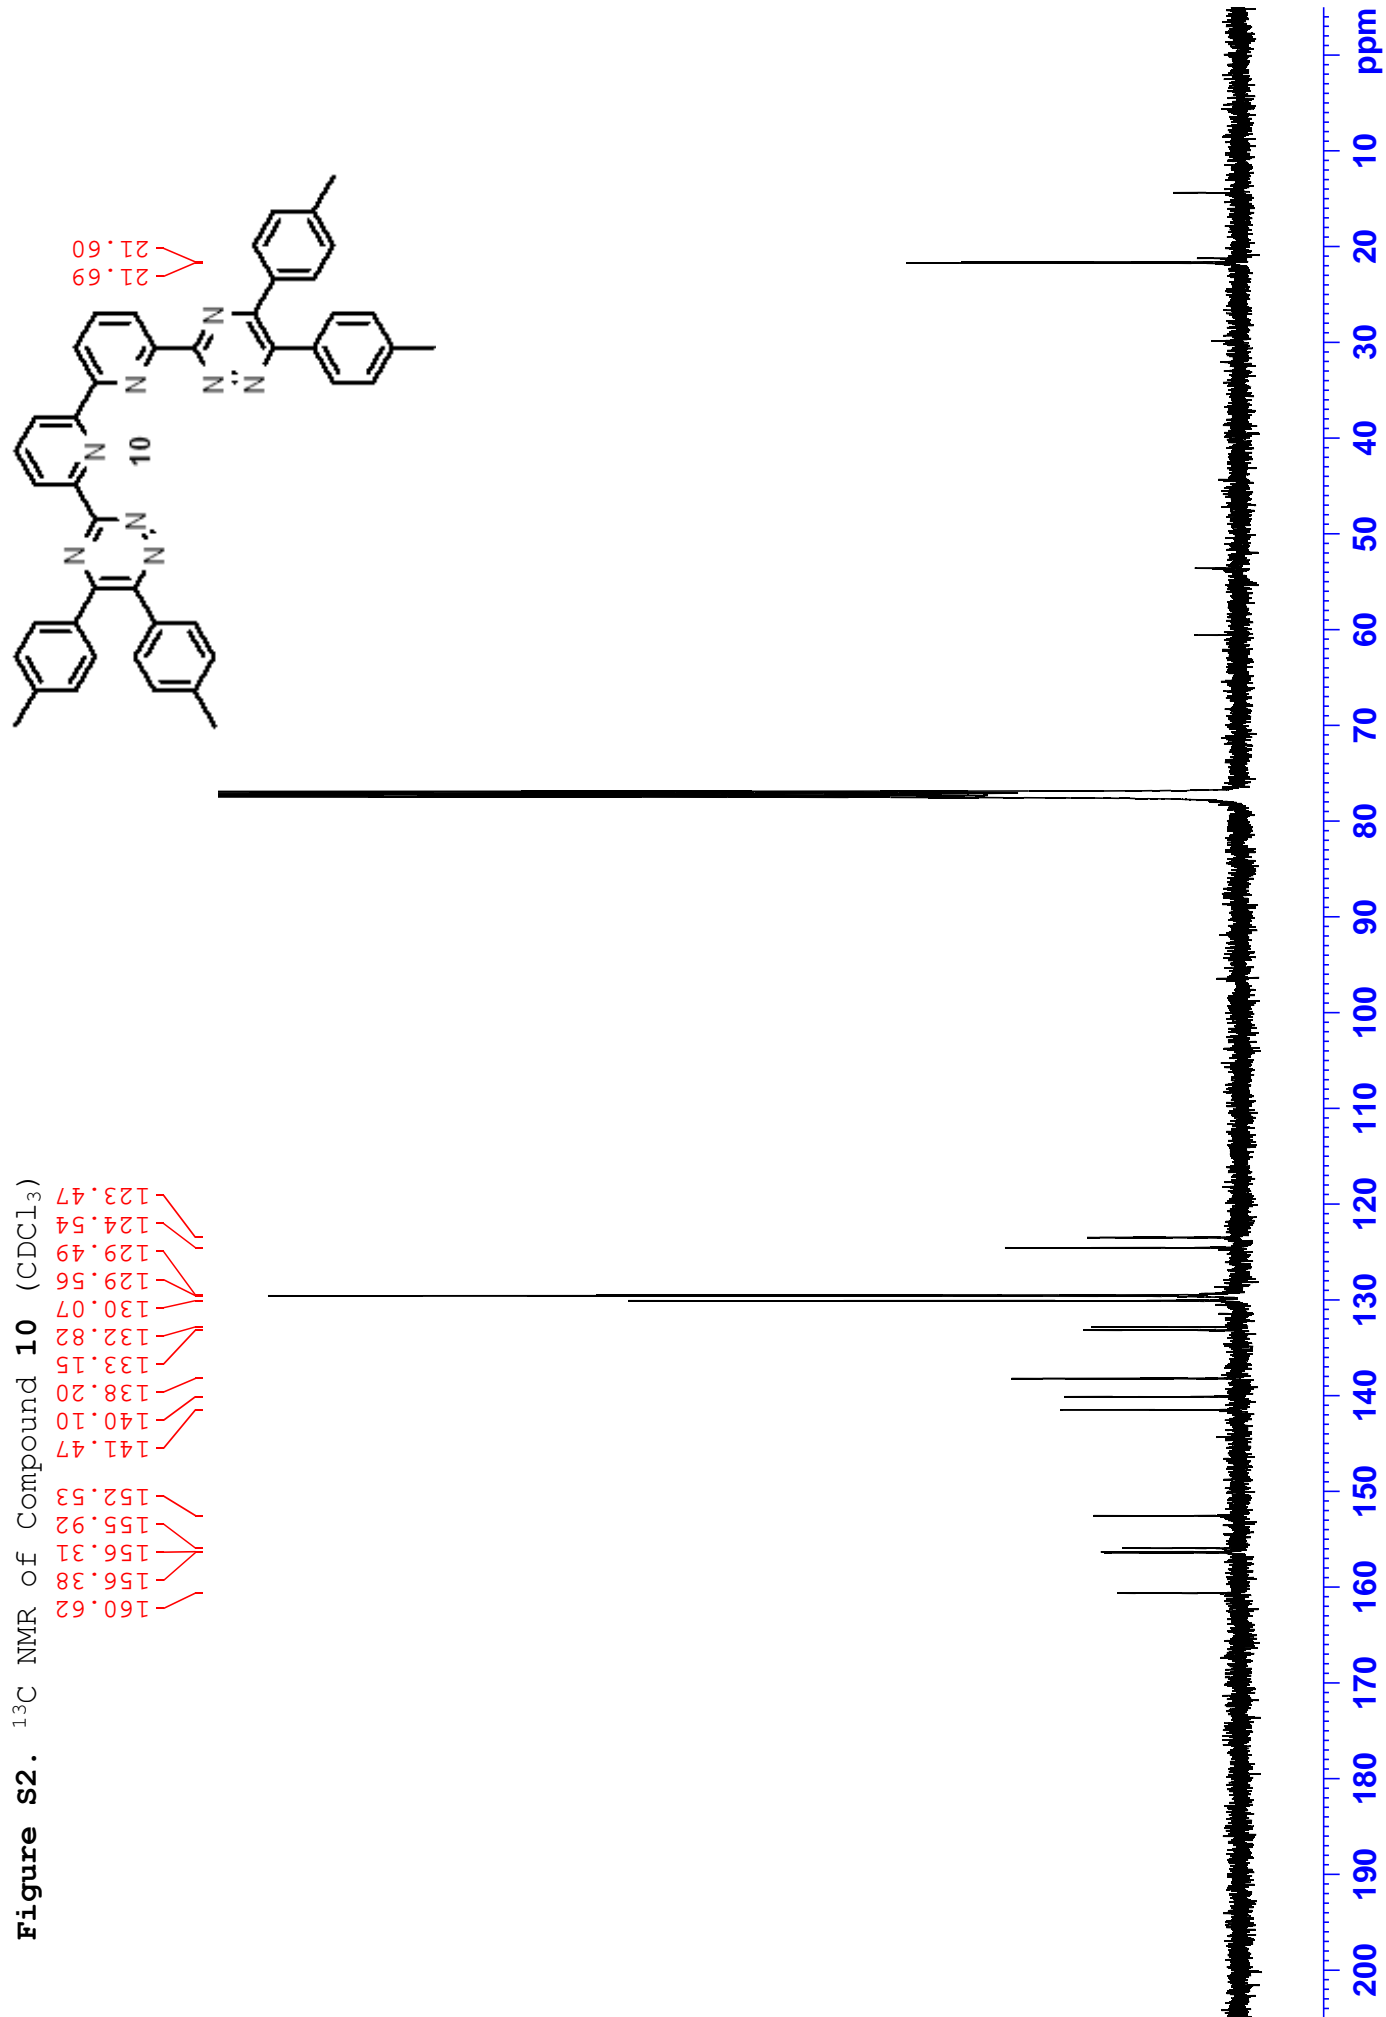

**Figure S3.**  $^1\text{H}$  NMR spectrum of **11** [ $(\text{CD}_3)_2\text{SO}$ ]

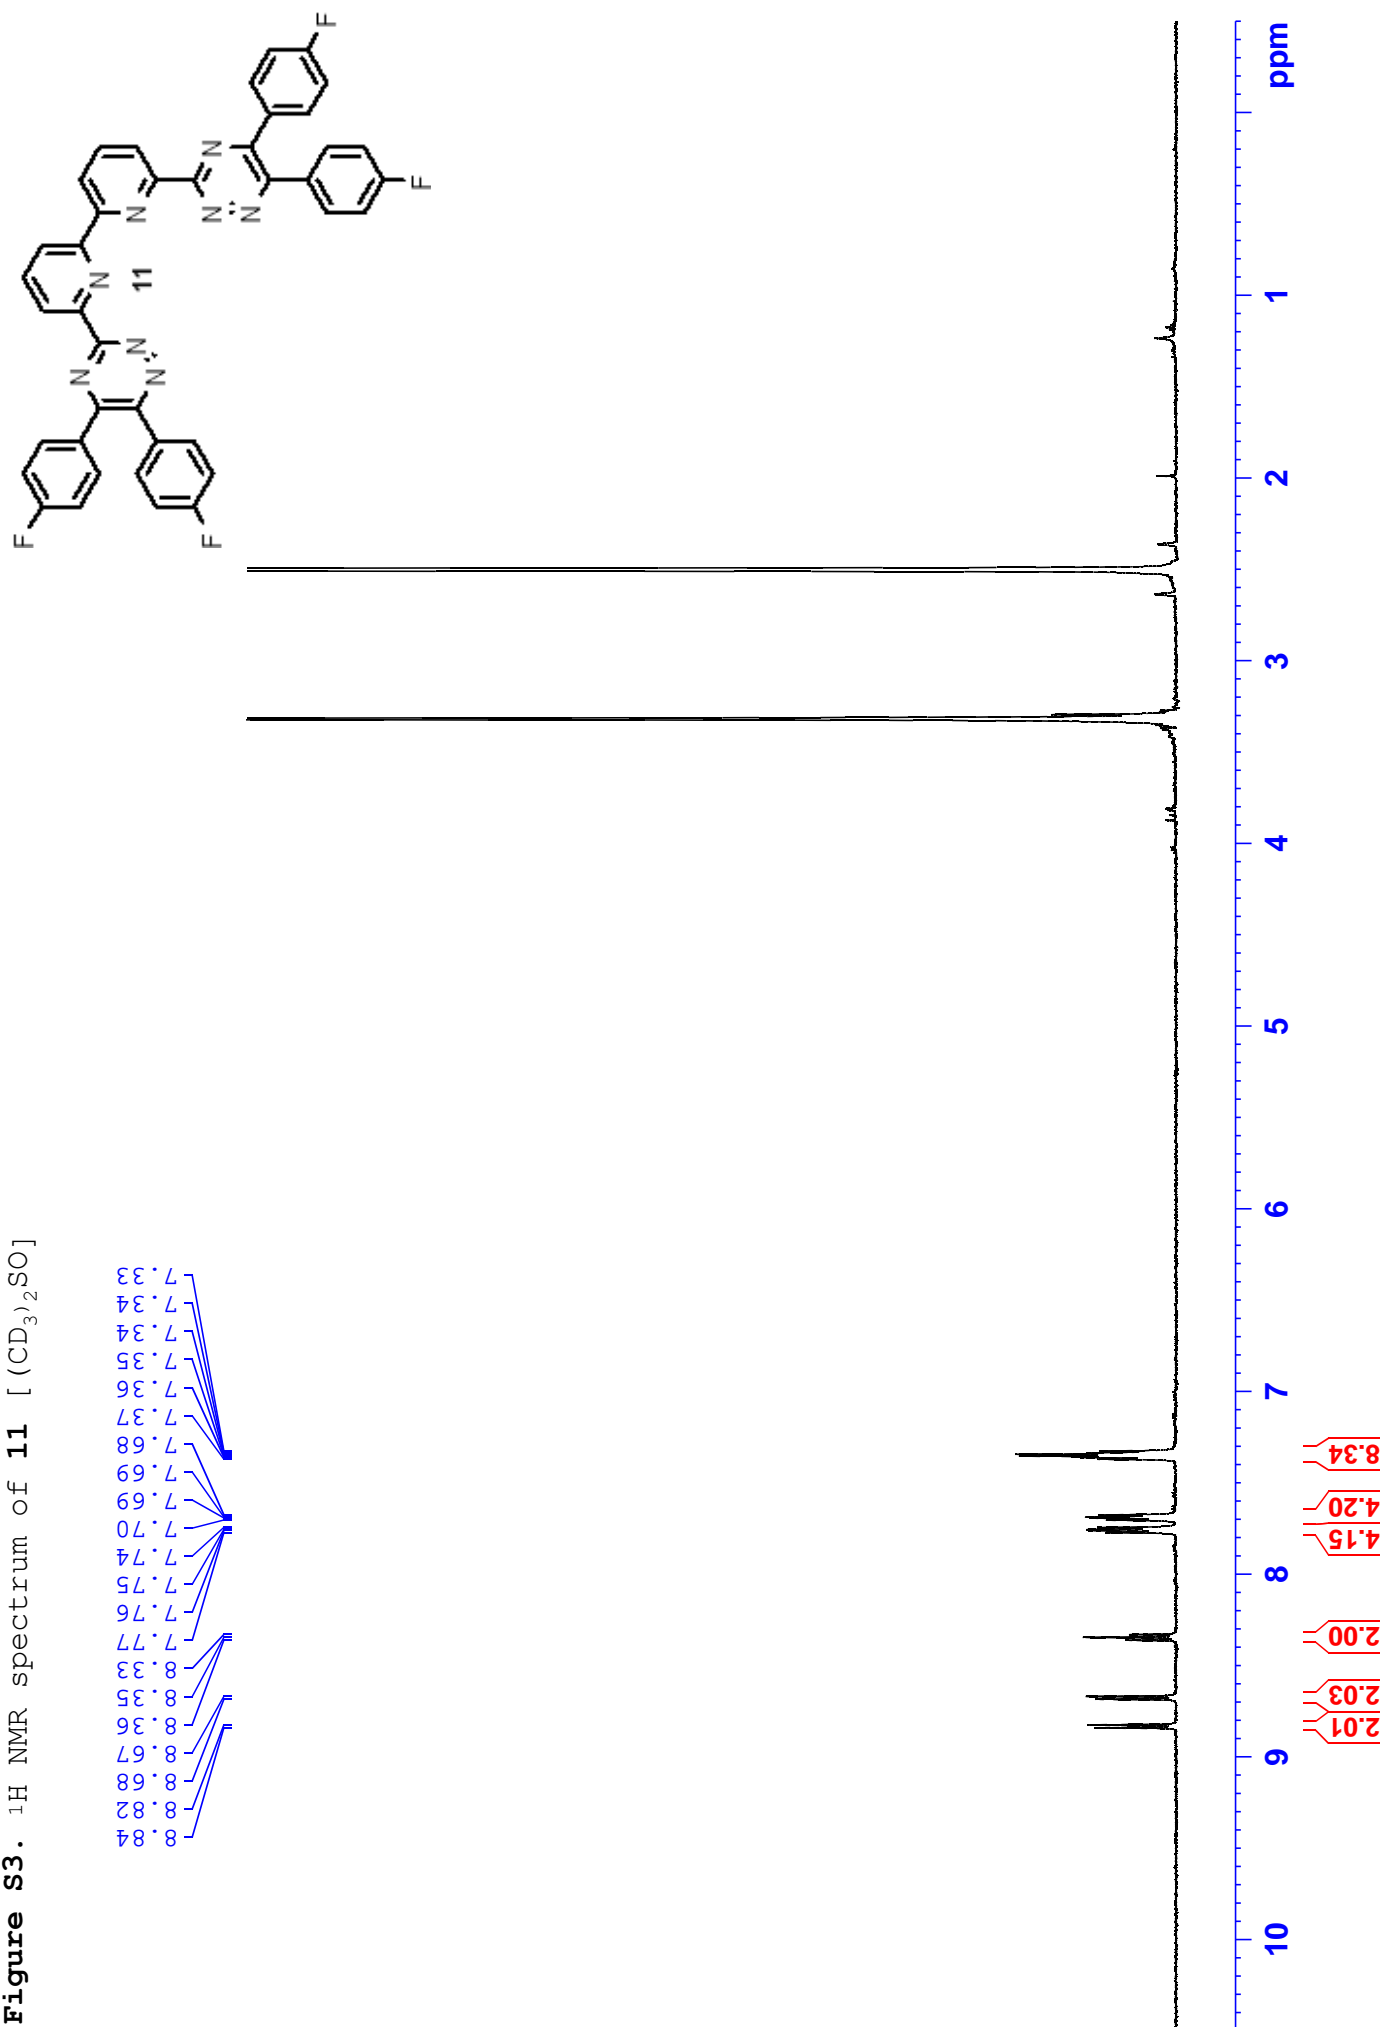

Figure S4. <sup>13</sup>C NMR spectrum of compound **11** [(CD<sub>3</sub>)<sub>2</sub>SO]

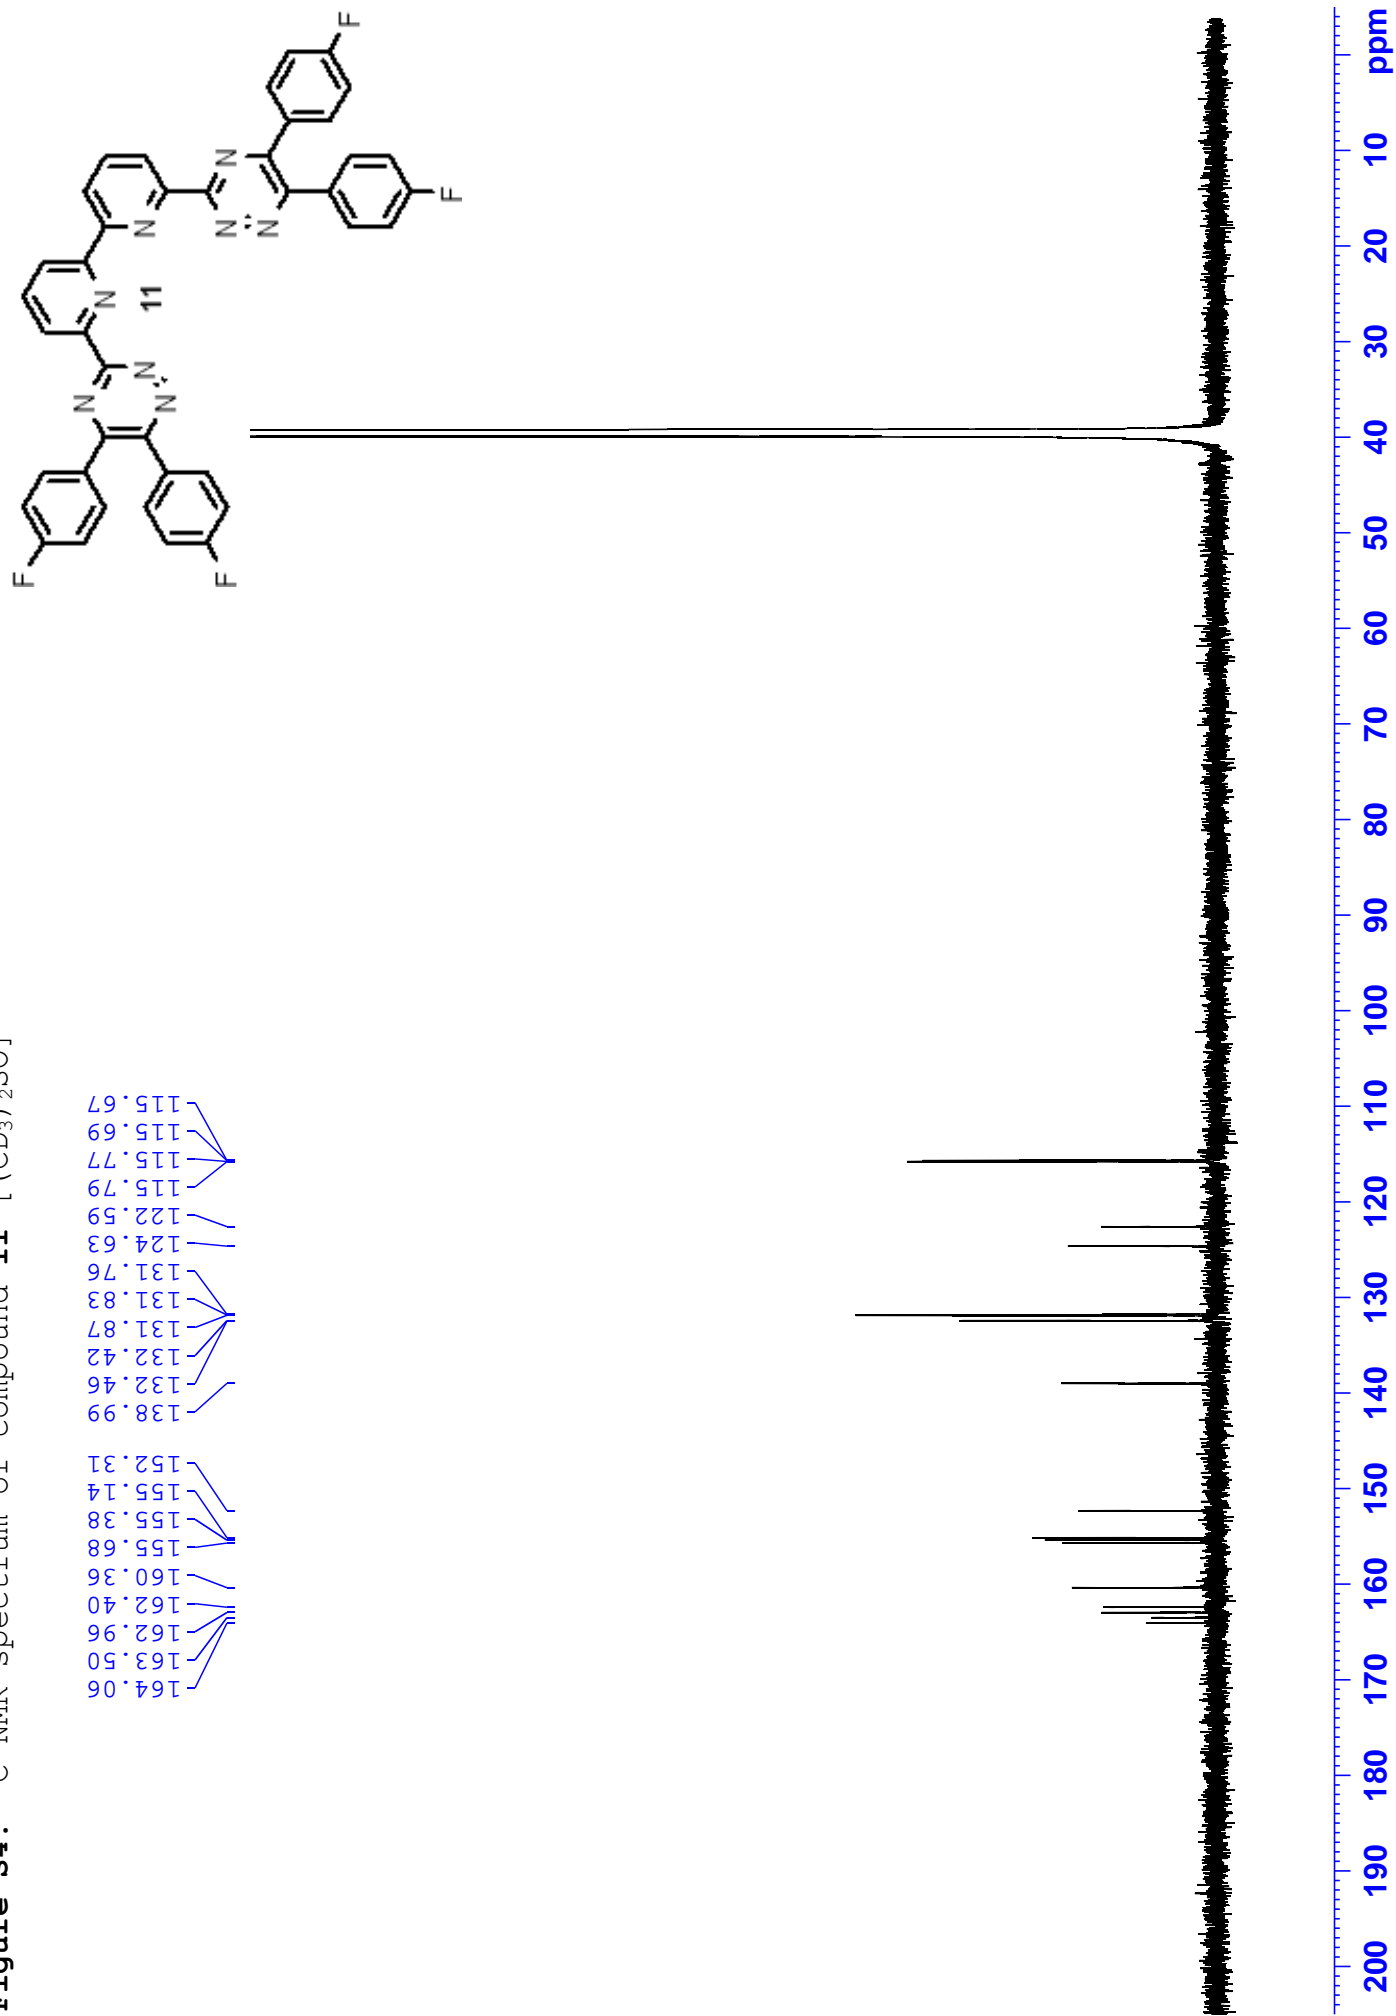

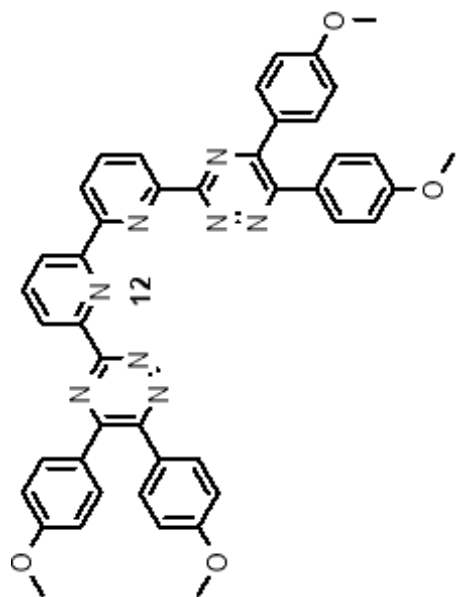

**Figure S5.**  $^1\text{H}$  NMR spectrum of compound **12** ( $\text{CDCl}_3$ )

9.034  
 9.019  
 8.734  
 8.719  
 8.144  
 8.129  
 8.114  
 7.810  
 7.793  
 7.687  
 7.670  
 6.964  
 6.944  
 6.926  
 3.877  
 3.870

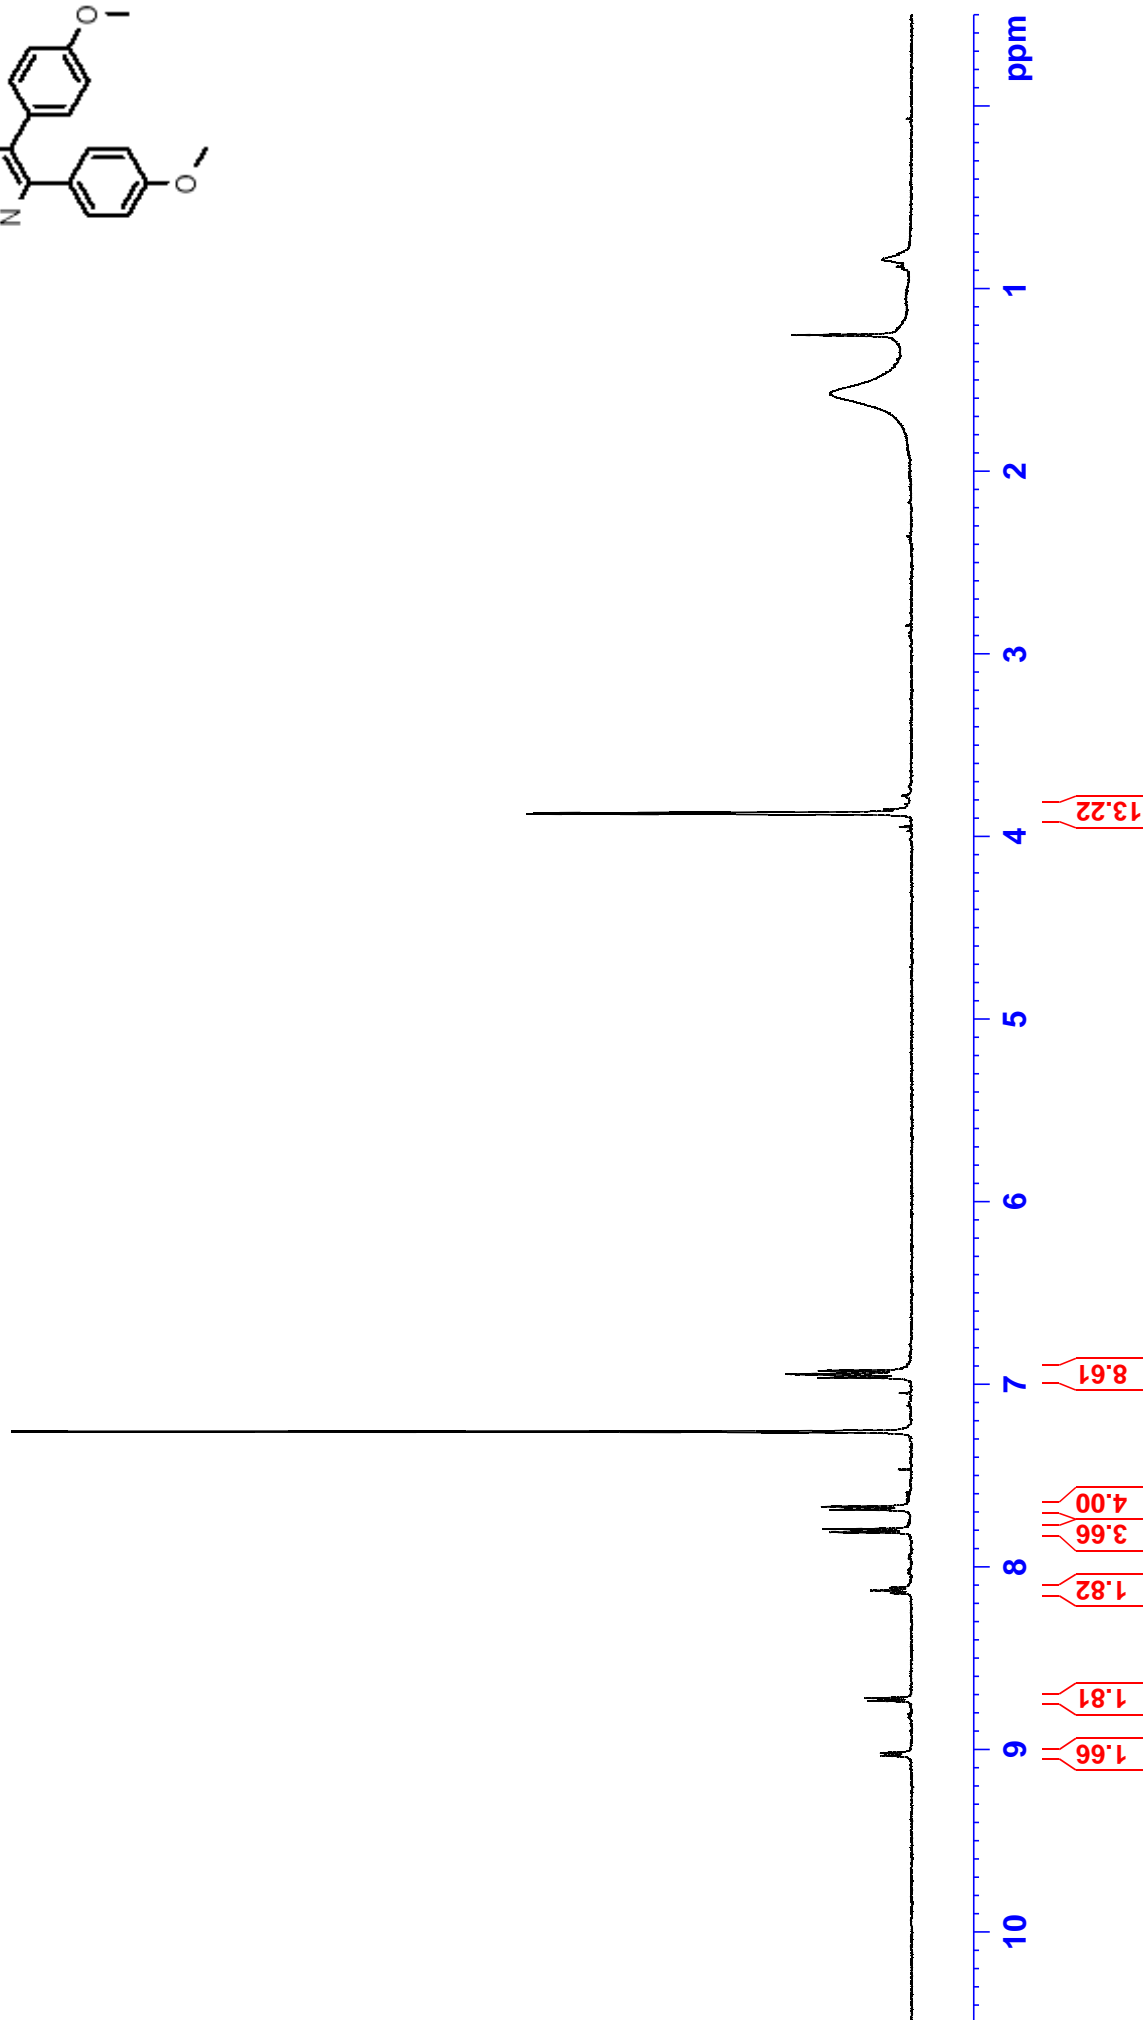

**Figure S6.**  $^{13}\text{C}$  NMR spectrum of compound **12** ( $\text{CDCl}_3$ )

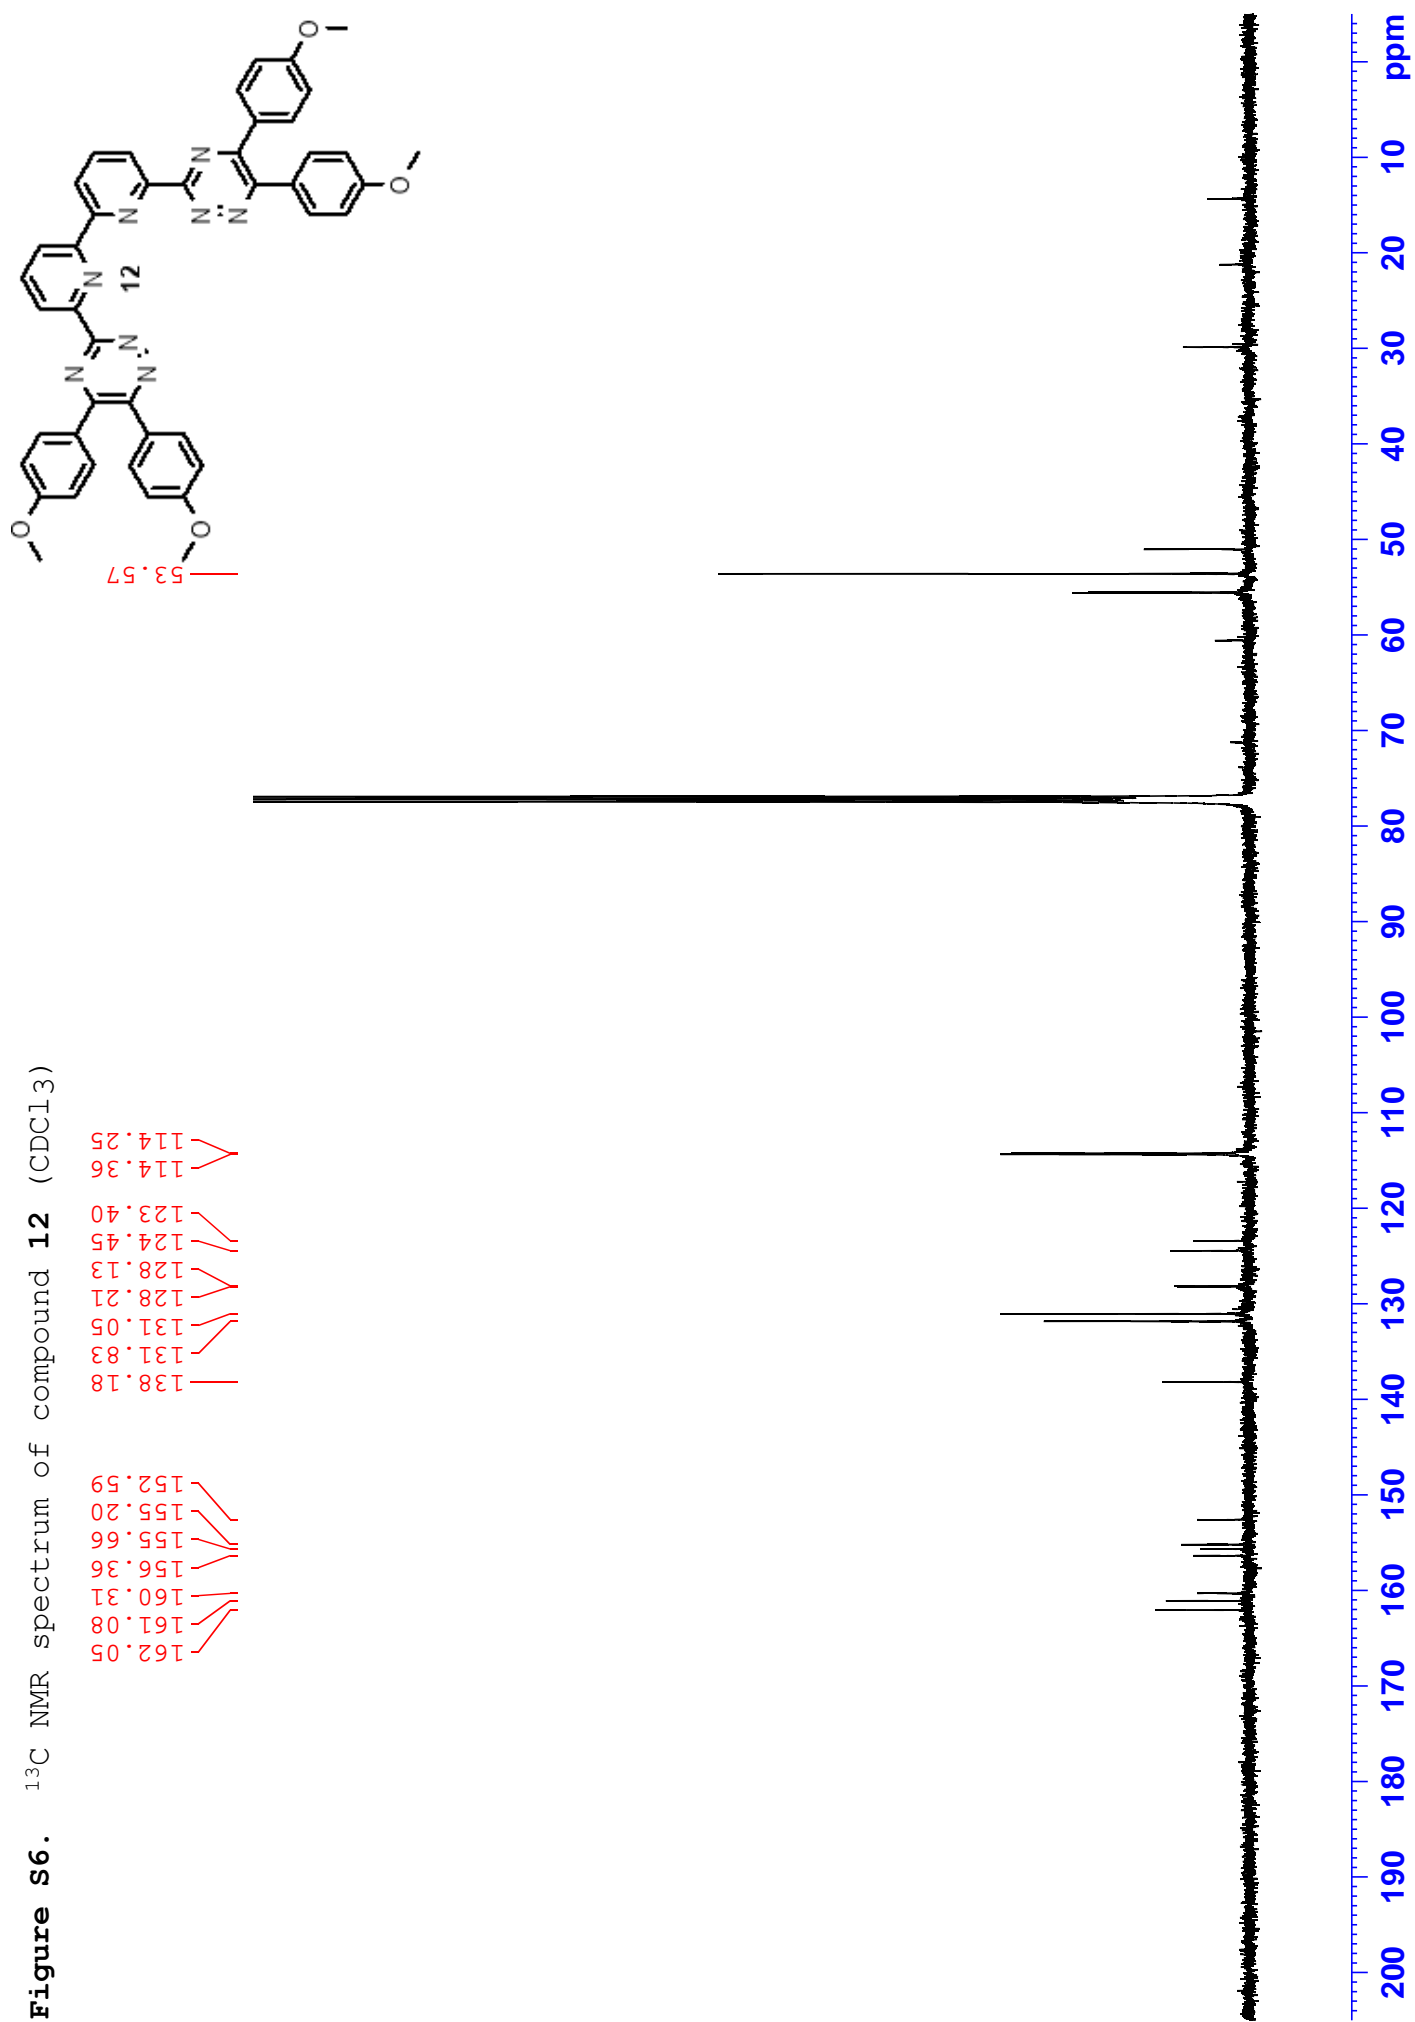

Figure S7. <sup>1</sup>H NMR spectrum of compound **13** (CDCl<sub>3</sub>)

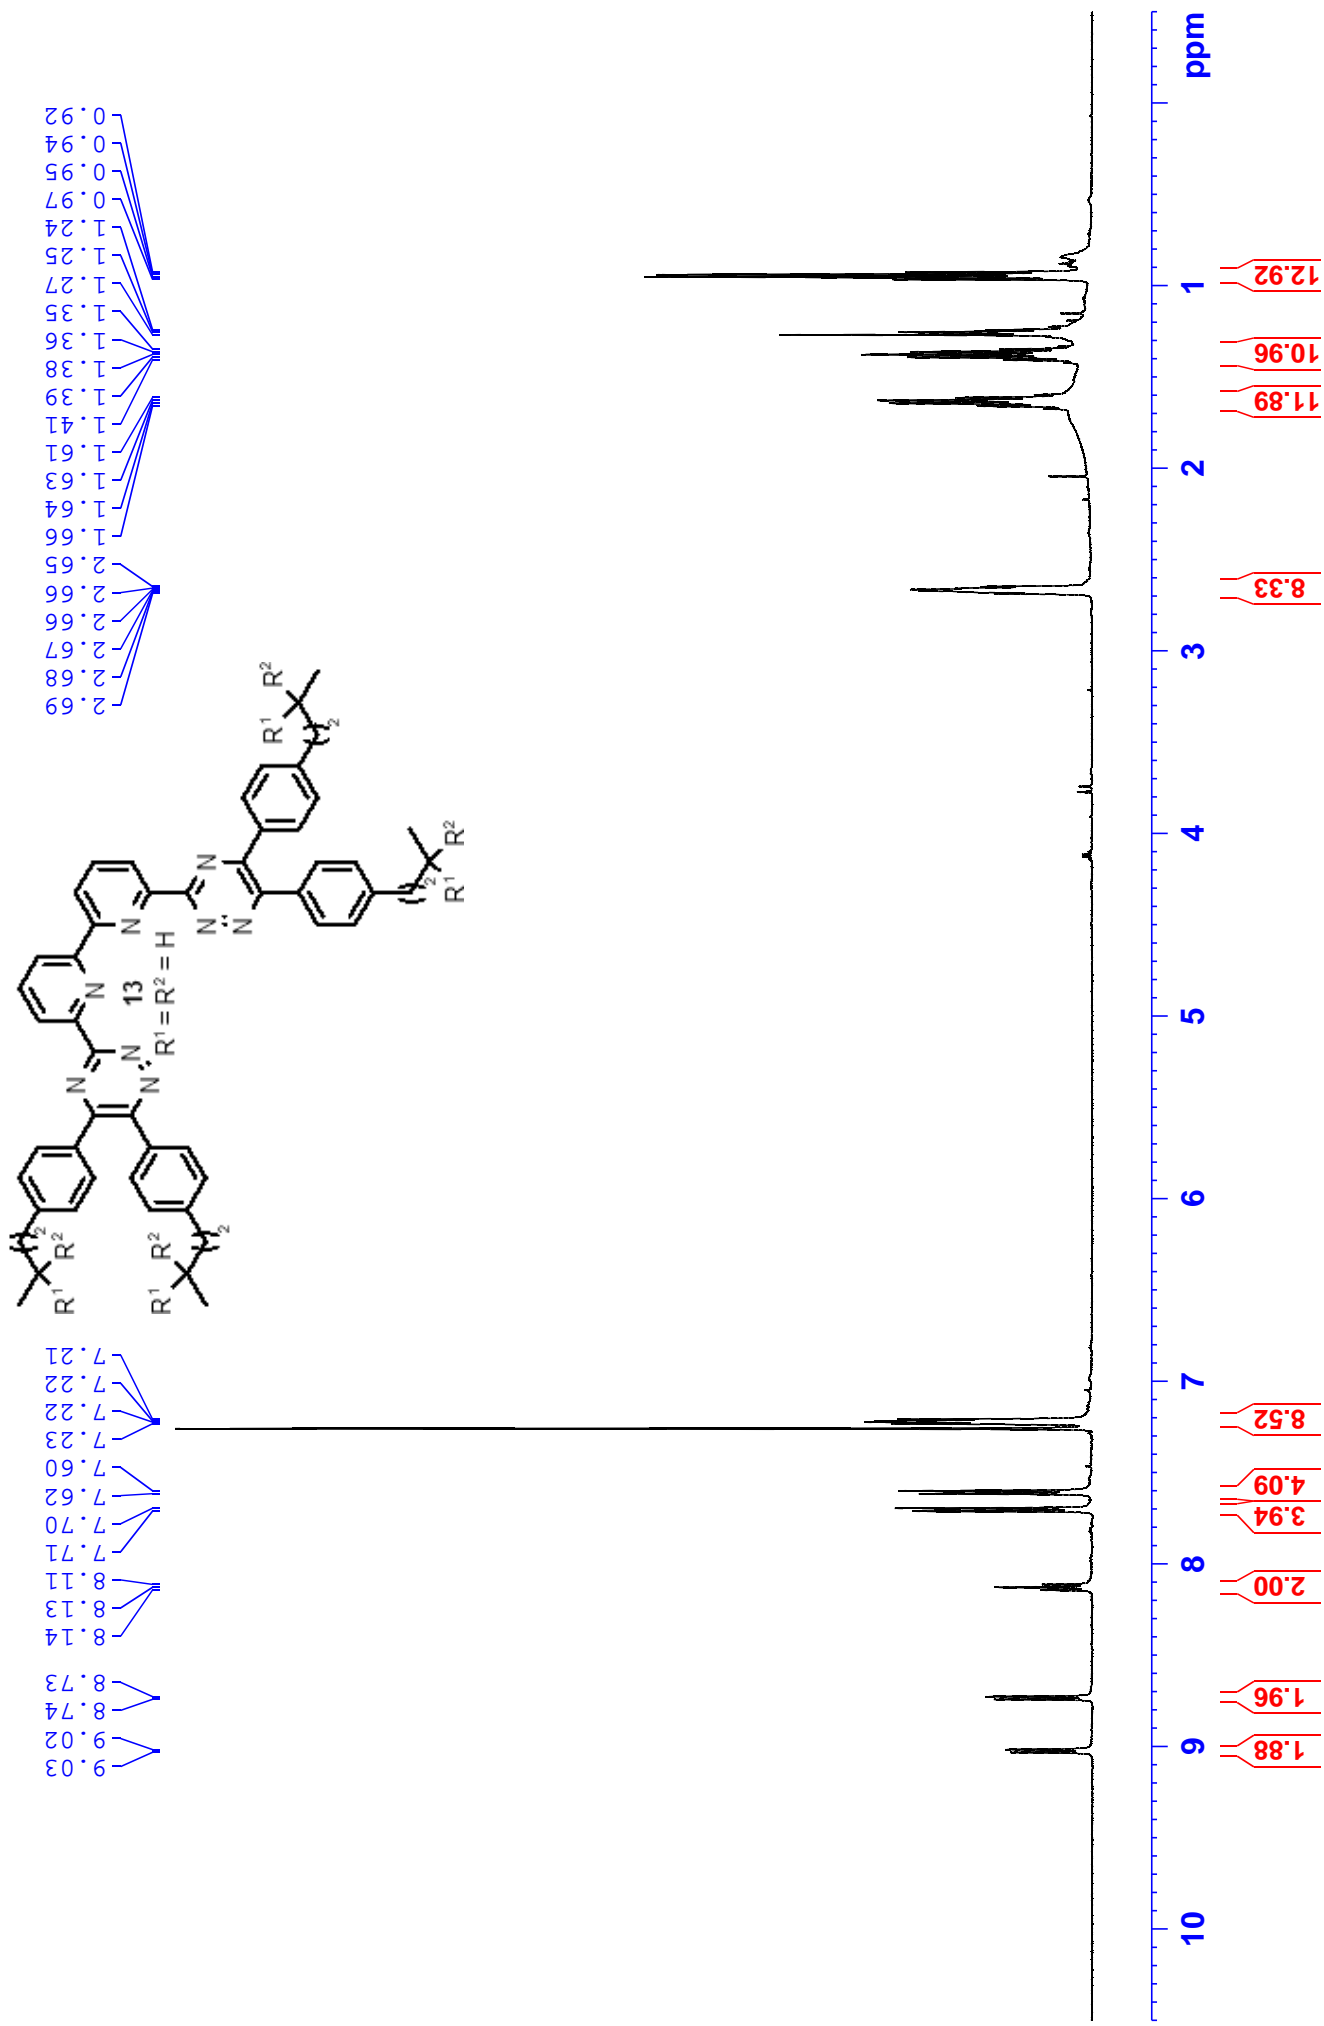



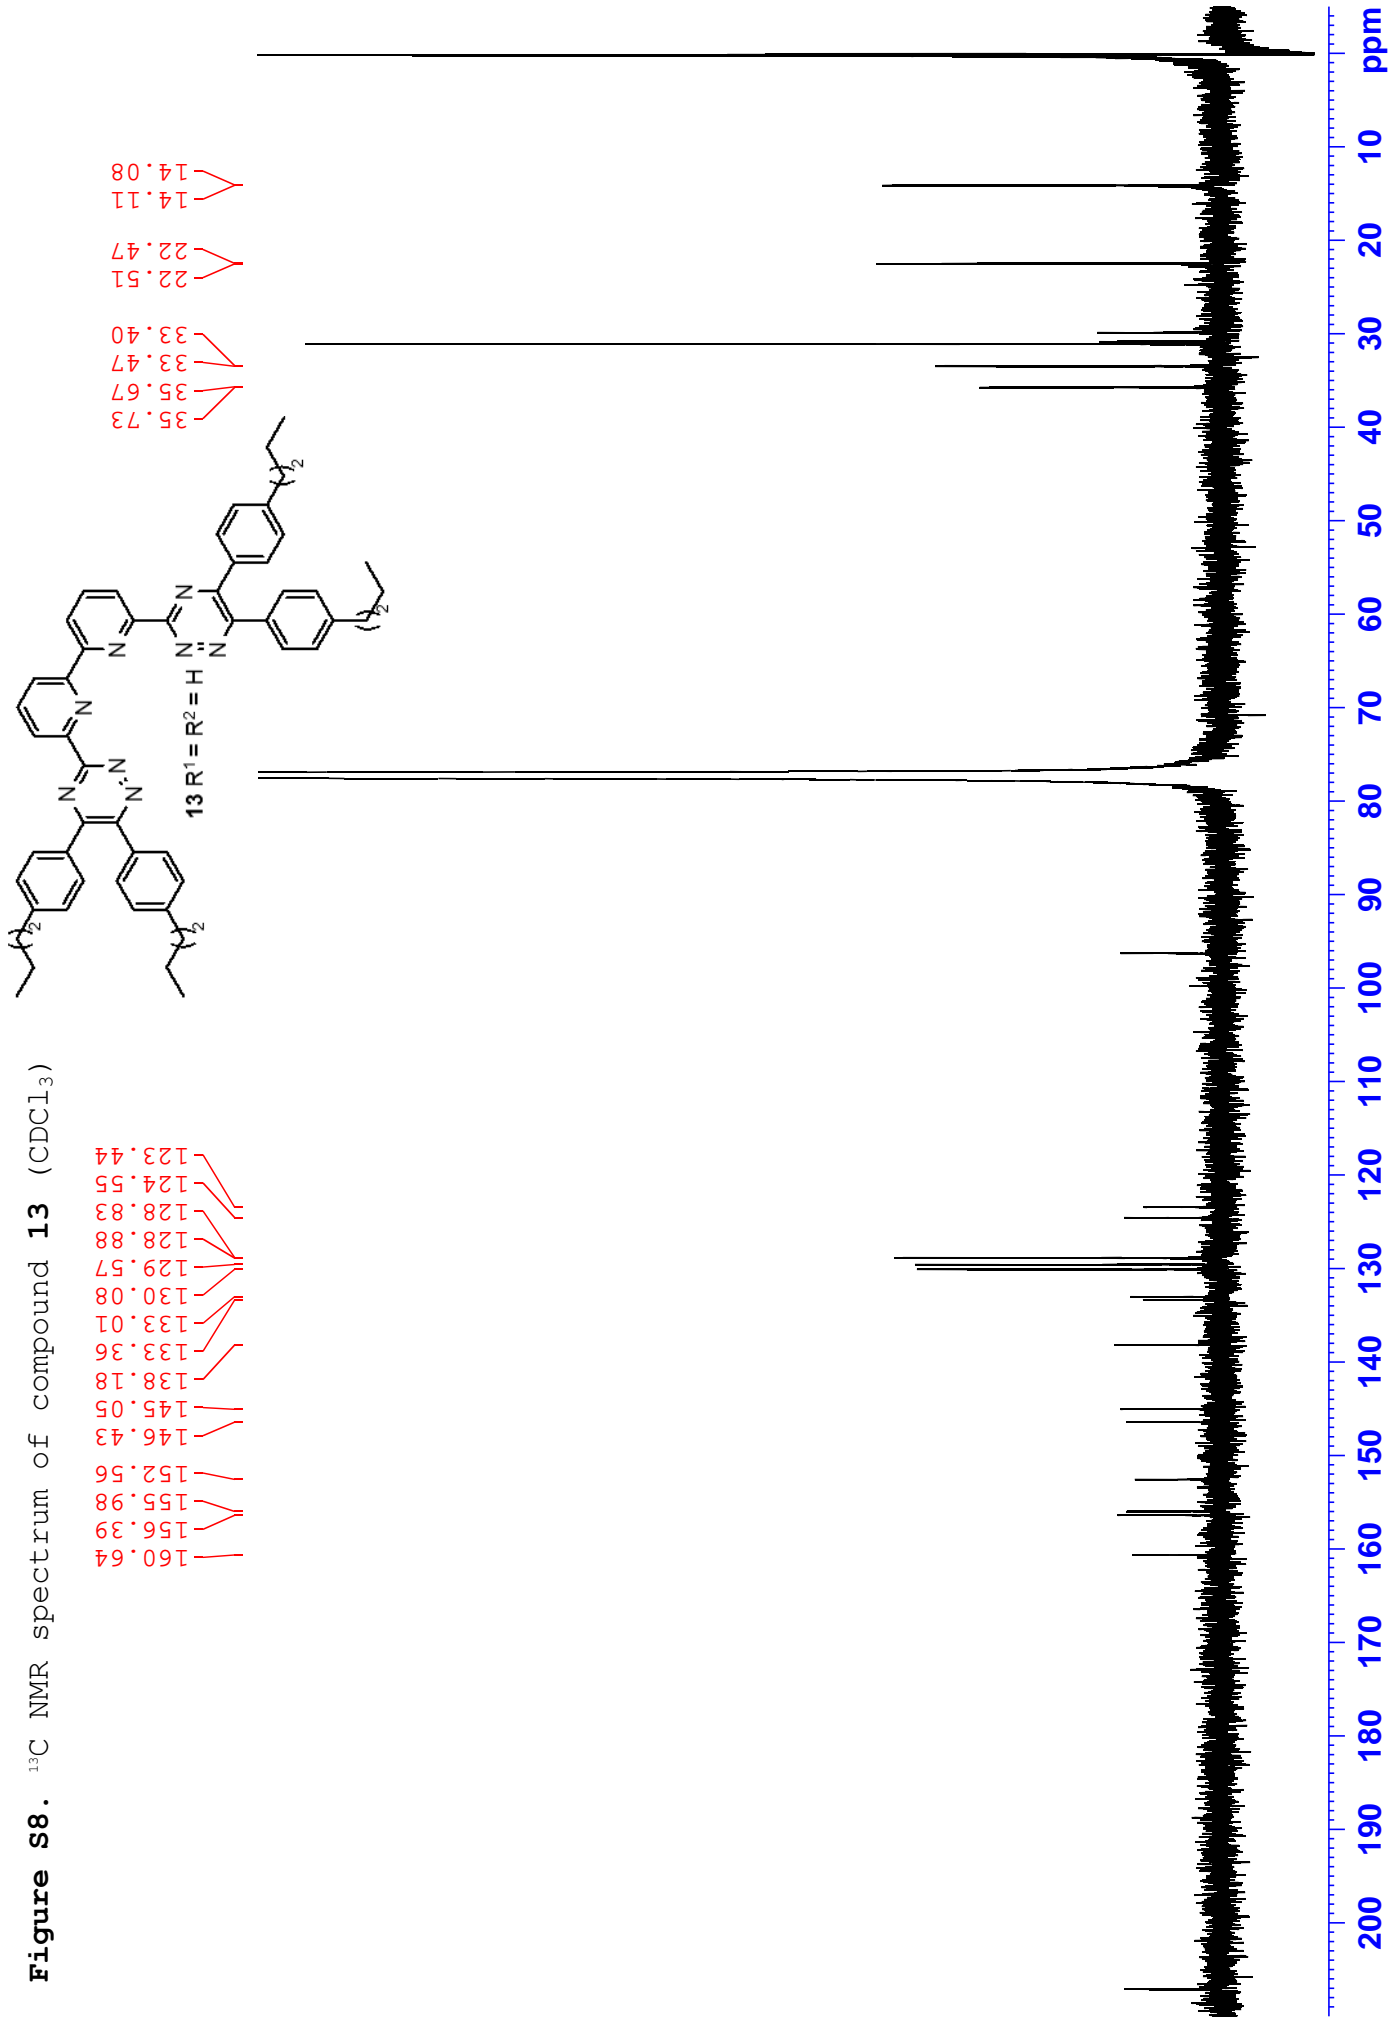

Figure S9. <sup>1</sup>H NMR spectrum of compound 14 (CDCl<sub>3</sub>)

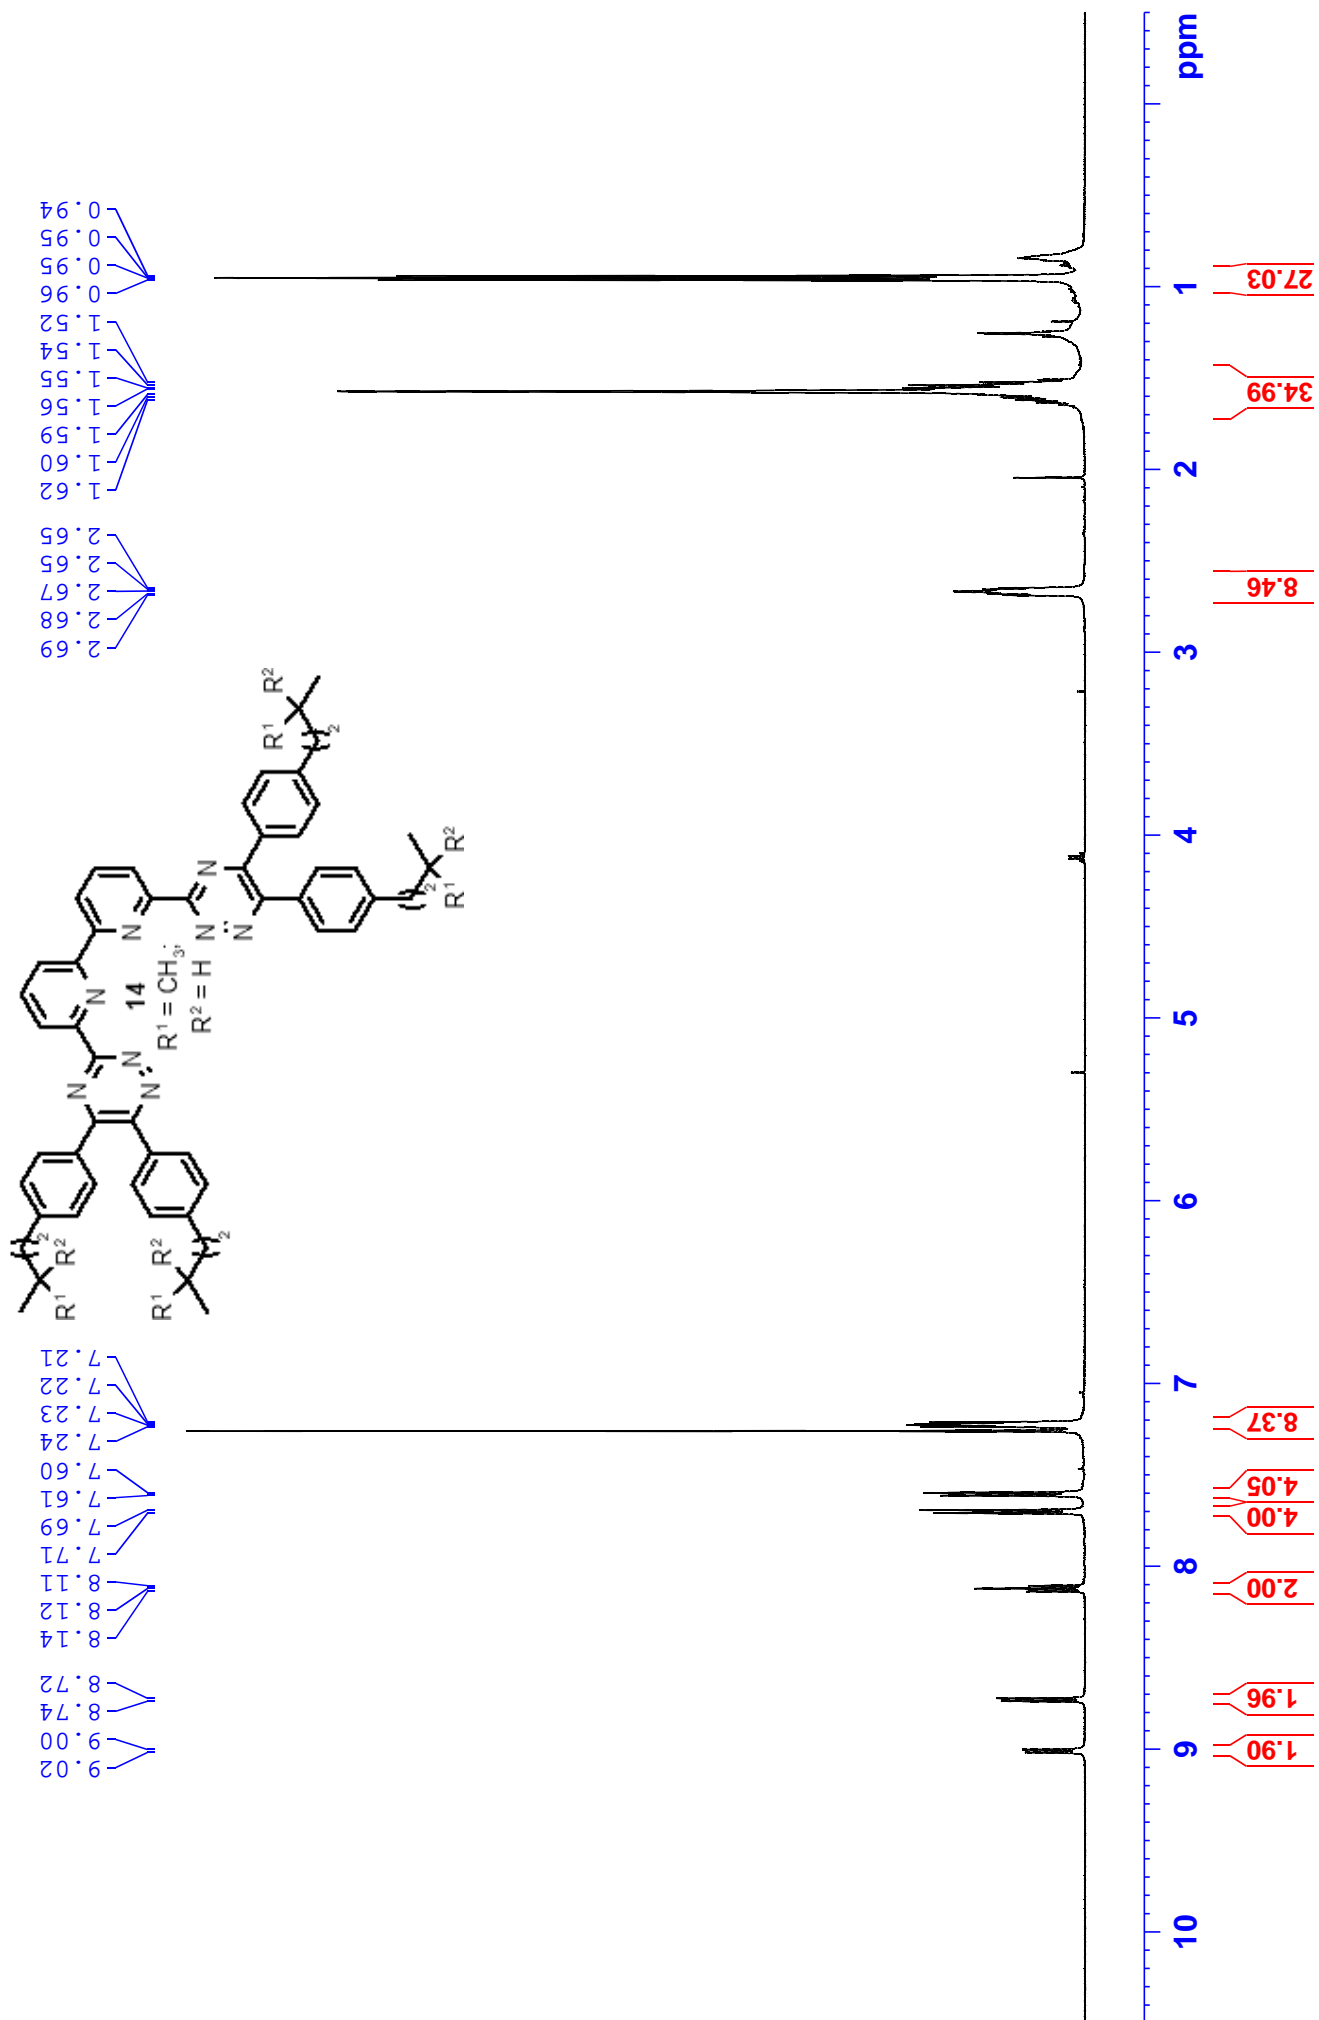

**Figure S10.**  $^{13}\text{C}$  NMR spectrum of compound **14** ( $\text{CDCl}_3$ )

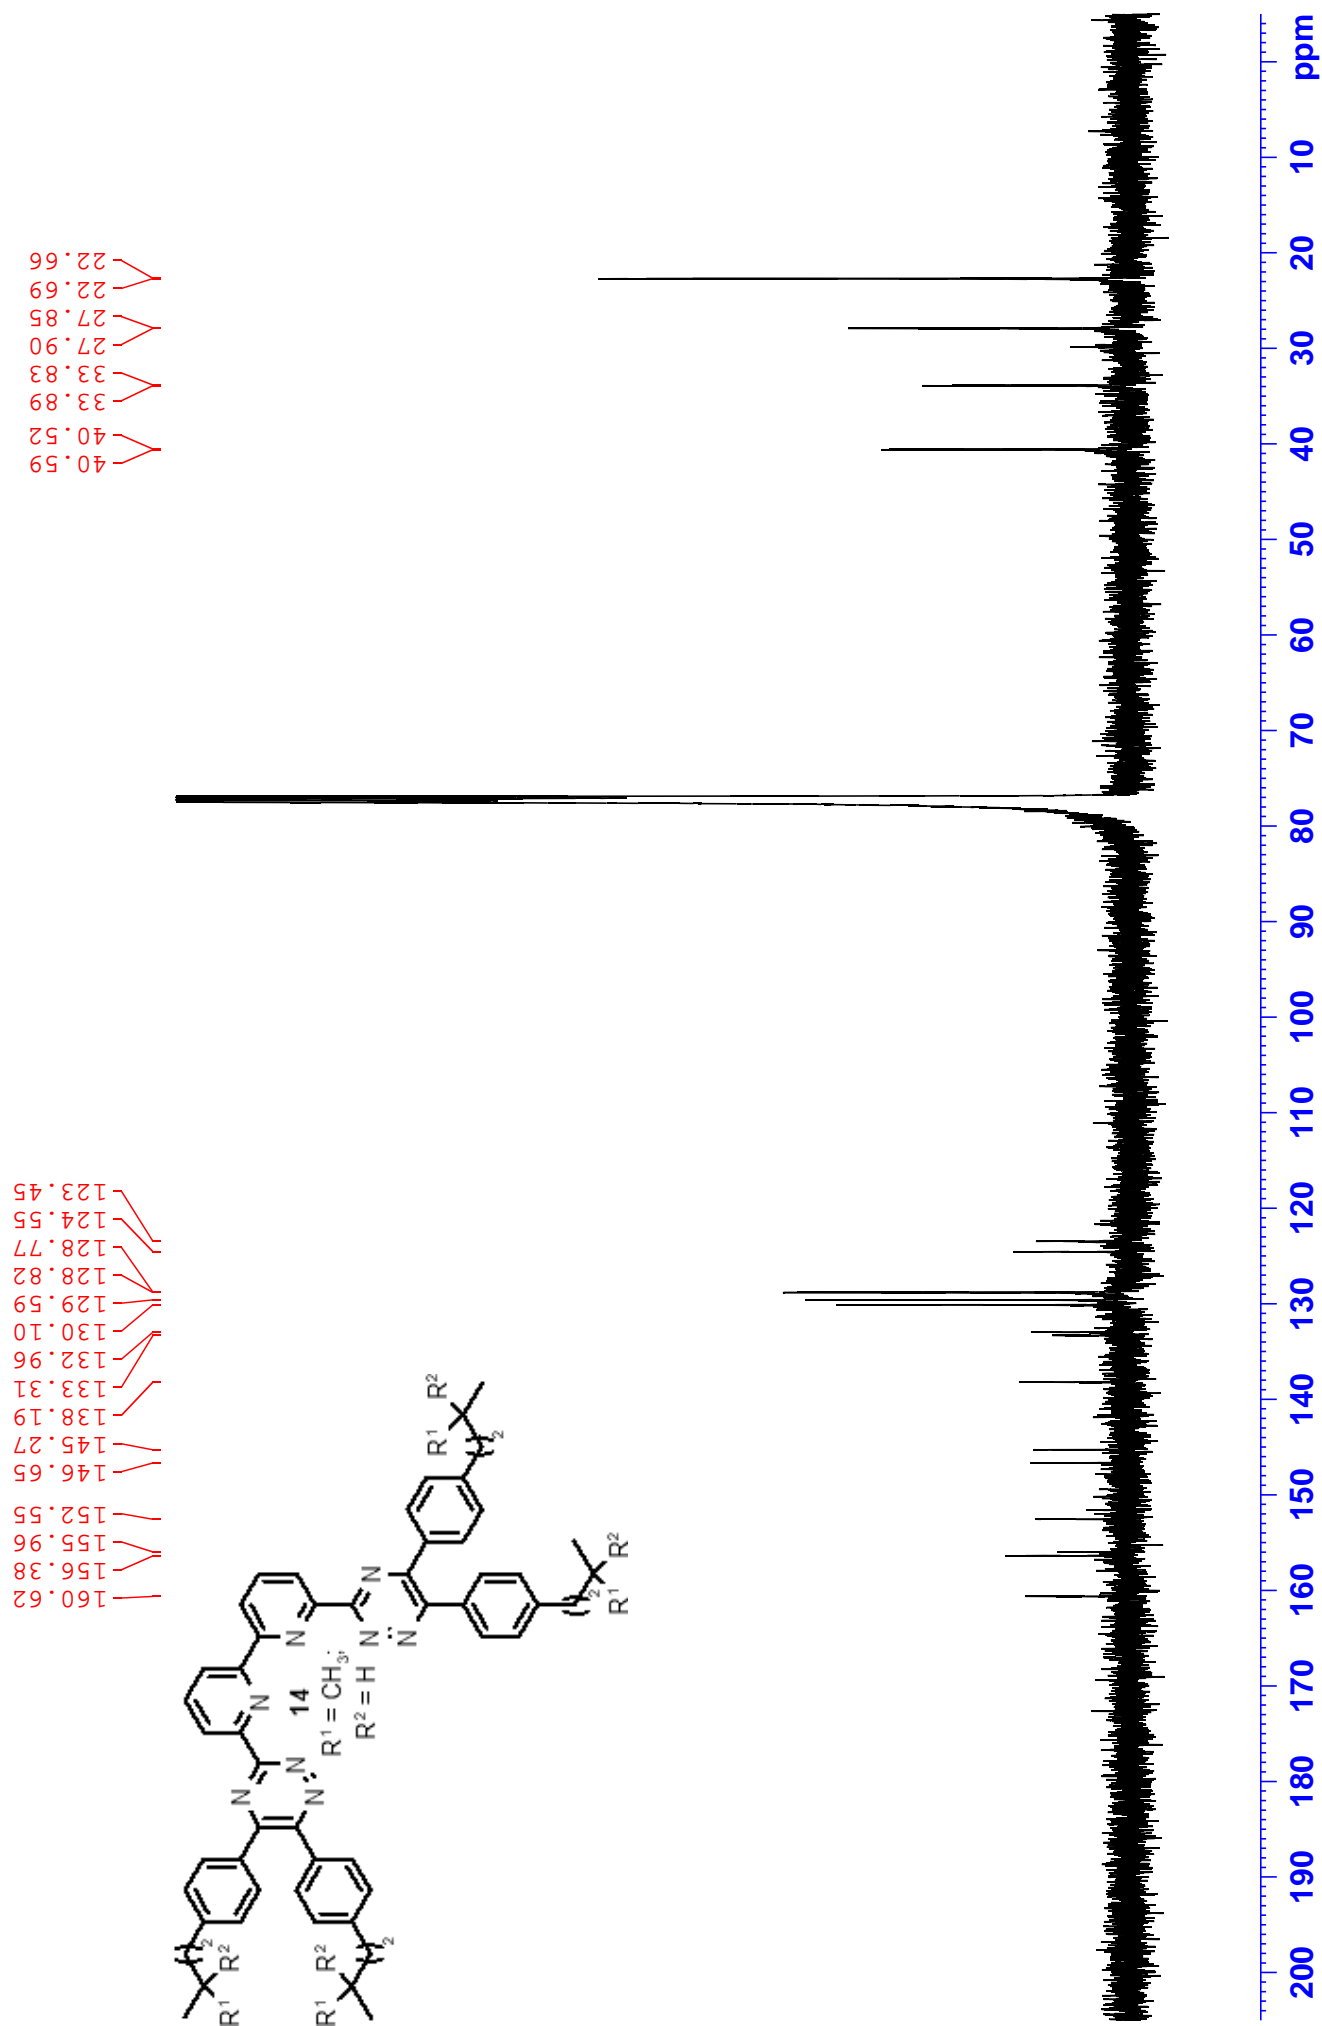

Figure 11. <sup>1</sup>H NMR spectrum of compound **15** (CDCl<sub>3</sub>)

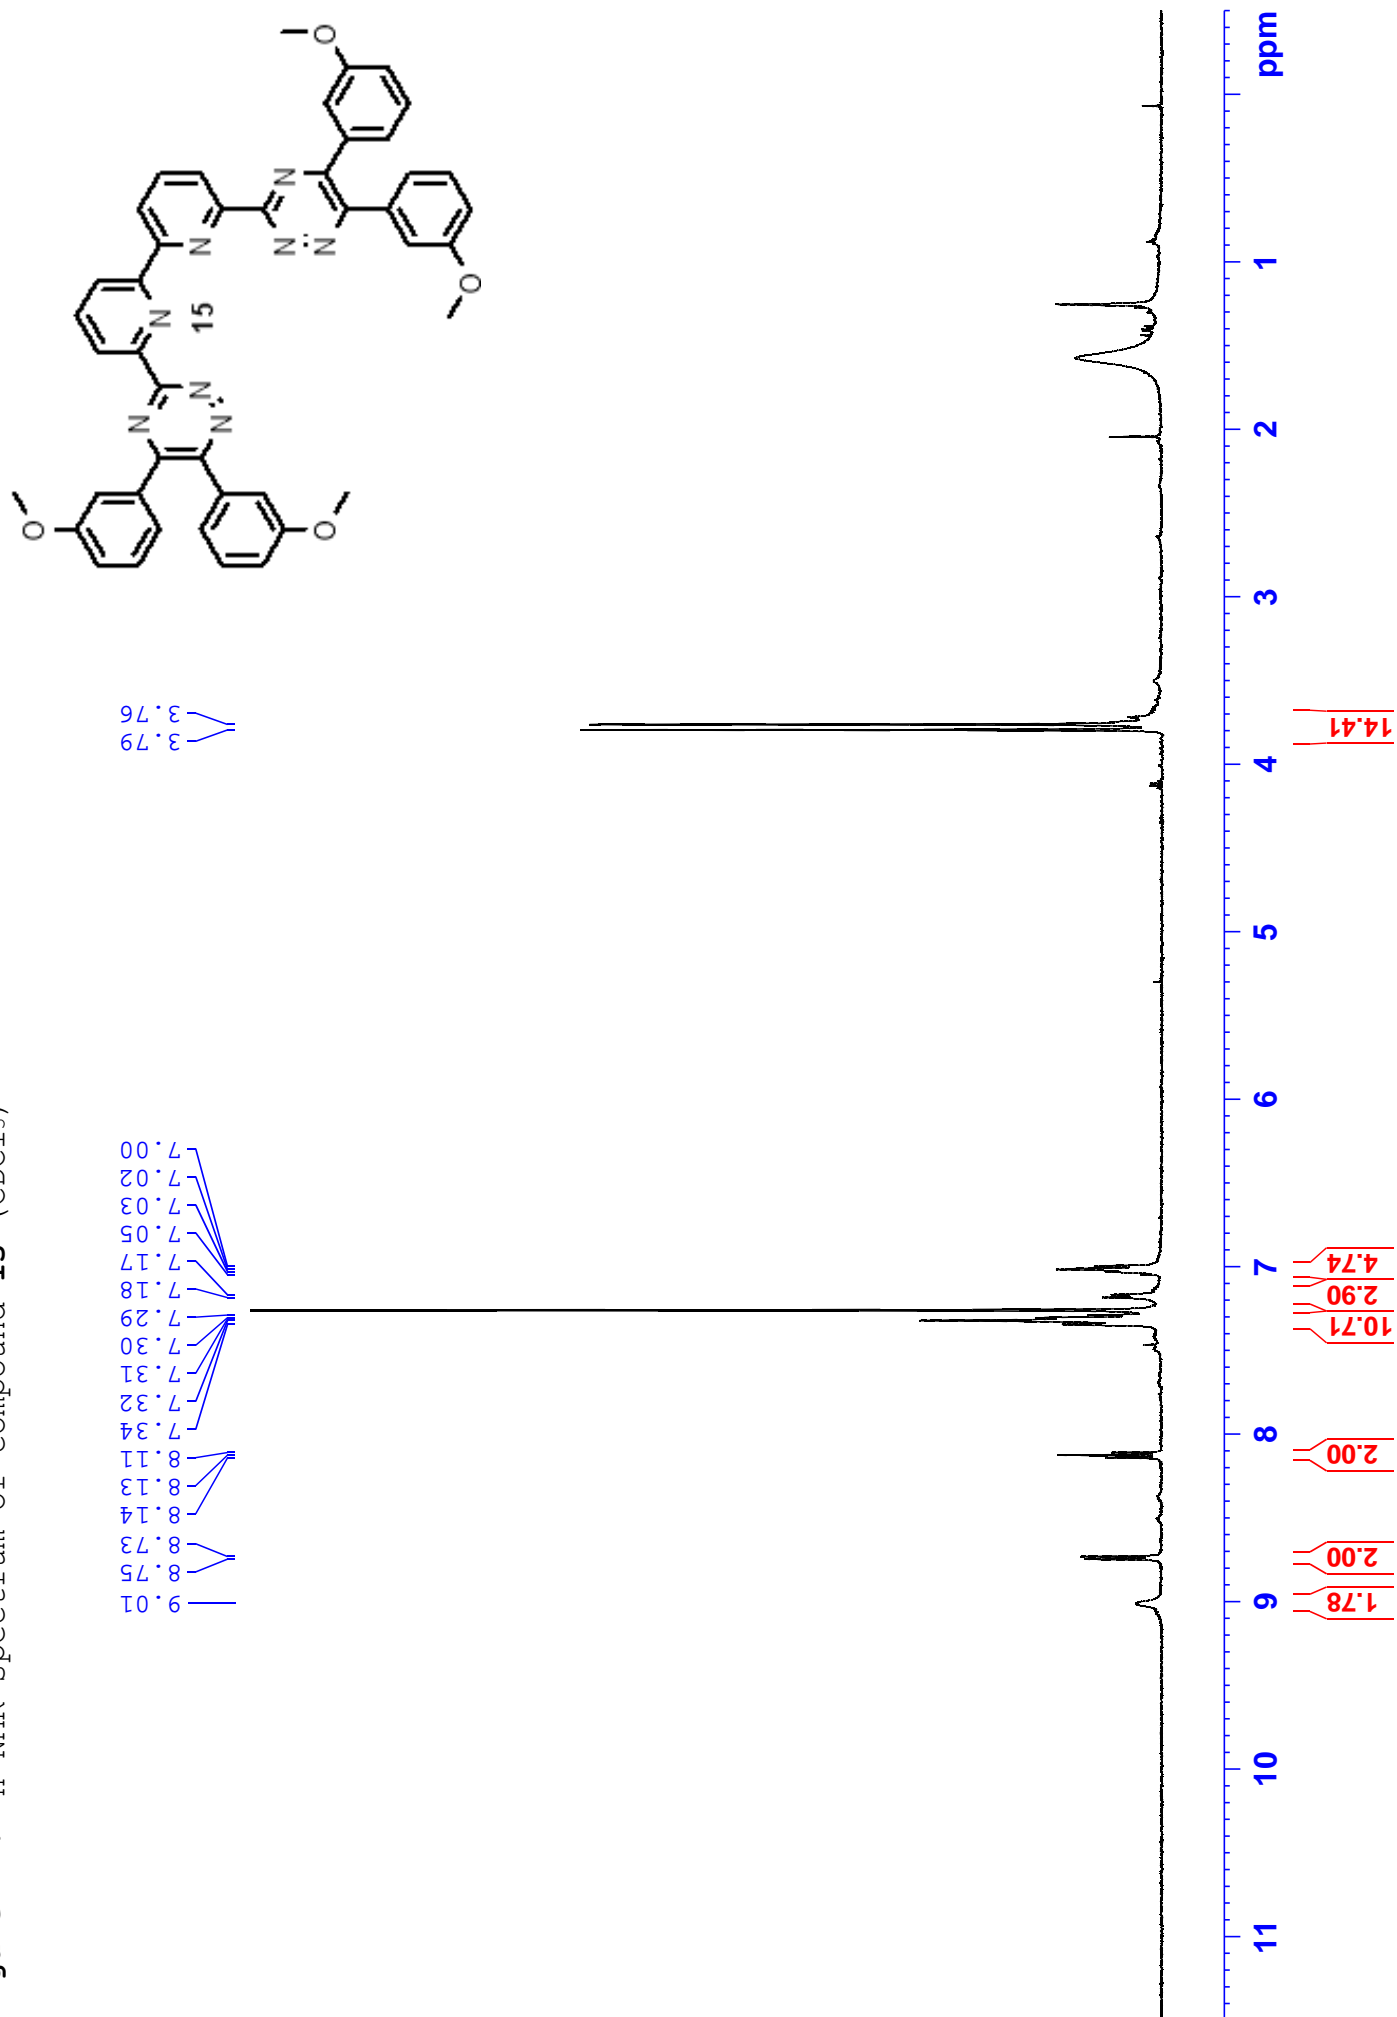

Figure S12. <sup>13</sup>C NMR spectrum of compound **15** (CDCl<sub>3</sub>)

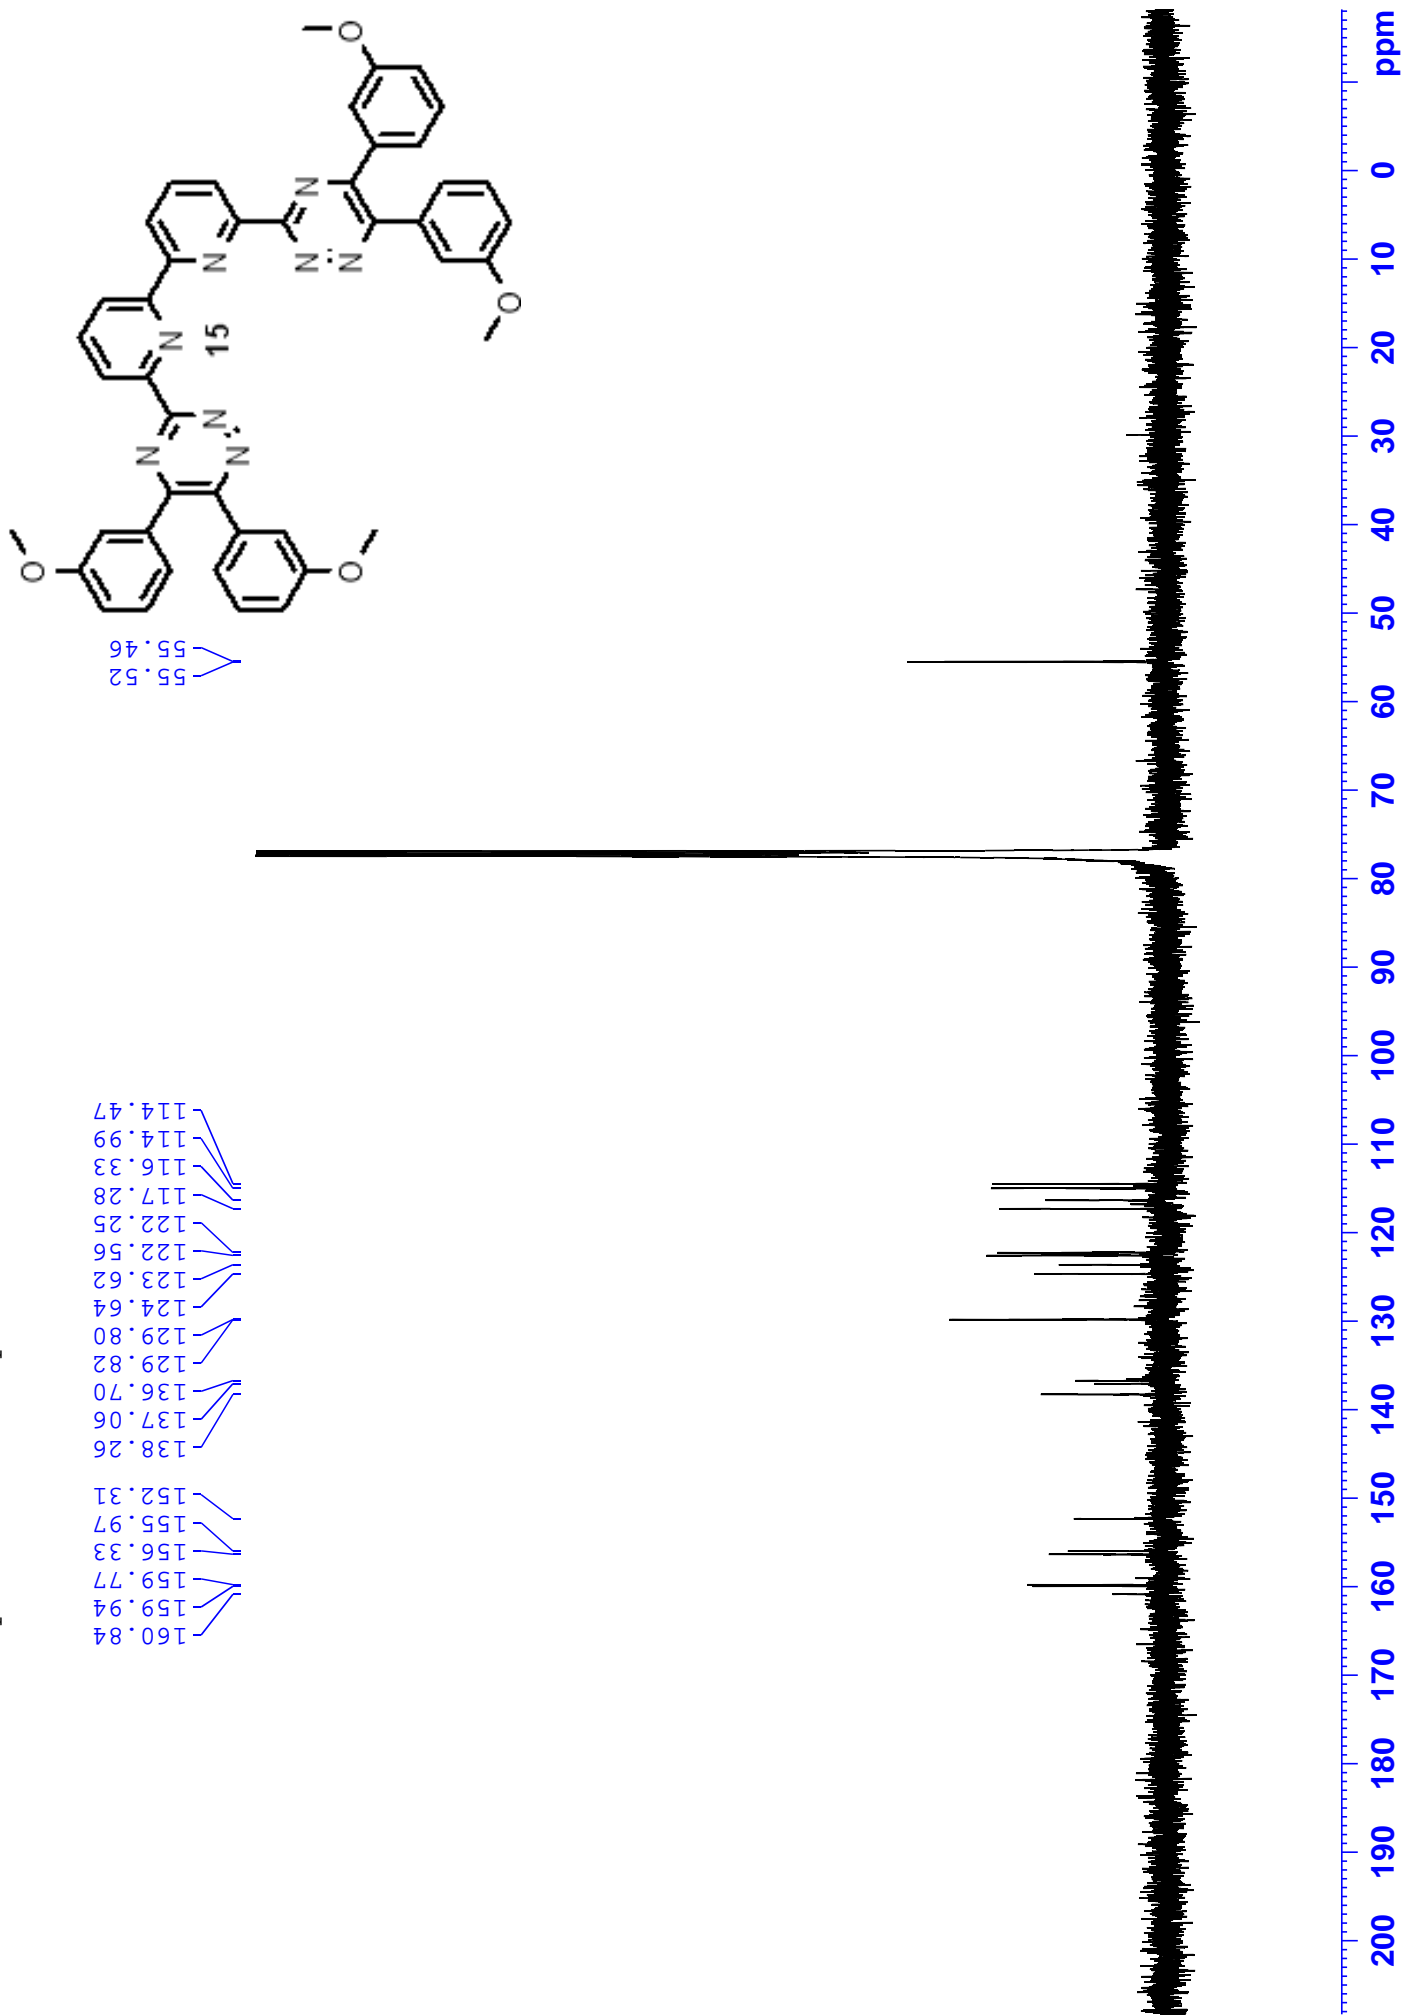

**Figure S13.**

Sample: GDW-B-243-1

Rf 200

Monday 18 March 2019 03:05PM

4x Column: 4  
 RediSep Column: Silica 4g  
 Flow Rate: 18 ml/min  
 Equilibration Volume: 33.6 ml  
 Initial Waste: 0.0 ml  
 Air Purge: 0.5 min  
 Solvent: A1 hexane  
 Solvent: B1 ethyl acetate

Peak Tube Volume: 15 ml  
 Non-Peak Tube Volume: 15 ml  
 Loading Type: Solid  
 Wavelength 1 (red): 254nm  
 Peak Width: 30 sec  
 Threshold: 0.20 AU  
 Wavelength 2 (purple): 280nm

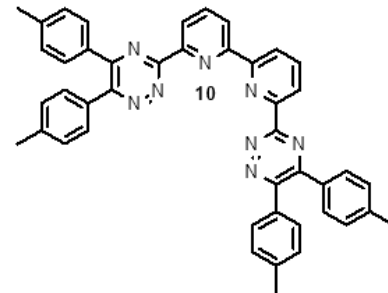

Run Notes: 6,6'-bis-[5,6-bis(4-methylphenyl)-[1,2,4]triazin-3-yl]-2,2'-bipyridine (10)

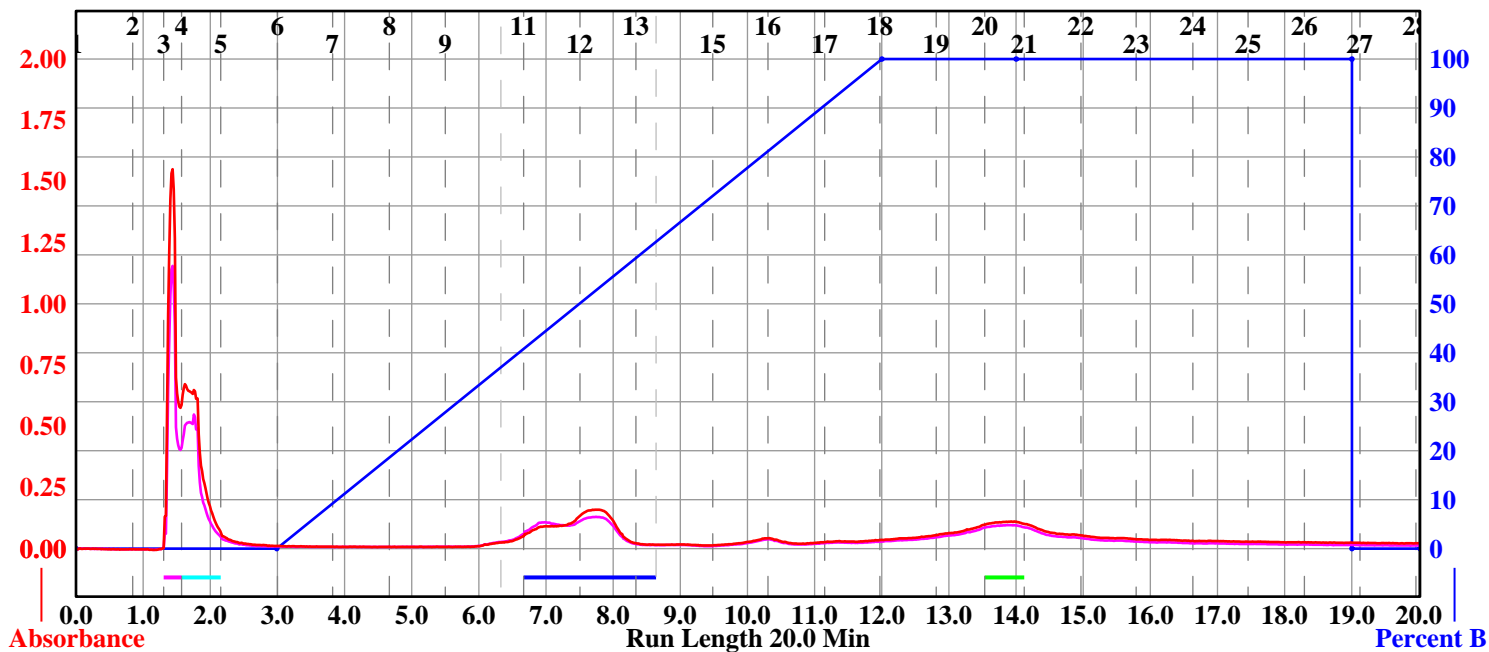

| Rack A |    |    |    |    |
|--------|----|----|----|----|
| 70     | 69 | 68 | 67 | 66 |
| 61     | 62 | 63 | 64 | 65 |
| 60     | 59 | 58 | 57 | 56 |
| 51     | 52 | 53 | 54 | 55 |
| 50     | 49 | 48 | 47 | 46 |
| 41     | 42 | 43 | 44 | 45 |
| 40     | 39 | 38 | 37 | 36 |
| 31     | 32 | 33 | 34 | 35 |
| 30     | 29 | 28 | 27 | 26 |
| 21     | 22 | 23 | 24 | 25 |
| 20     | 19 | 18 | 17 | 16 |
| 11     | 12 | 13 | 14 | 15 |
| 10     | 9  | 8  | 7  | 6  |
| 1      | 2  | 3  | 4  | 5  |

18 mm x 150 mm Tubes

| Peak # | Start Tube | End Tube |
|--------|------------|----------|
| 1      | A:3        | A:3      |
| 2      | A:4        | A:4      |
| 3      | A:11       | A:13     |
| 4      | A:20       | A:20     |

| Duration | %B    | Solvent A | Solvent B        |
|----------|-------|-----------|------------------|
| 0.0      | 0.0   | A1 hexane | B1 ethyl acetate |
| 3.0      | 0.0   | A1 hexane | B1 ethyl acetate |
| 9.0      | 100.0 | A1 hexane | B1 ethyl acetate |
| 2.0      | 100.0 | A1 hexane | B1 ethyl acetate |
| 5.0      | 100.0 | A1 hexane | B1 ethyl acetate |
| 0.0      | 0.0   | A1 hexane | B1 ethyl acetate |
| 1.0      | 0.0   | A1 hexane | B1 ethyl acetate |

**Figure S14.**

Sample: GDW-C-51-1

Rf 200

Tuesday 04 June 2019 10:46AM

RediSep Column: Silica 4g  
 Flow Rate: 18 ml/min  
 Equilibration Volume: 33.6 ml  
 Initial Waste: 0.0 ml  
 Air Purge: 0.5 min  
 Solvent: A1 hexane  
 Solvent: B1 ethyl acetate

Peak Tube Volume: Max.  
 Non-Peak Tube Volume: Max.  
 Loading Type: Solid  
 Wavelength 1 (red): 254nm  
 Peak Width: 30 sec  
 Threshold: 0.20 AU  
 Wavelength 2 (purple): 280nm

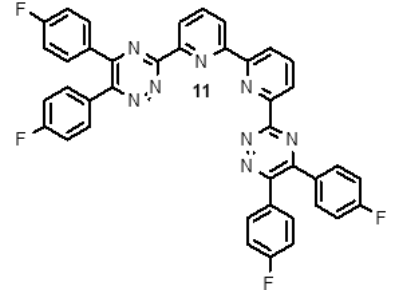

Run Notes: 6,6'-bis-[5,6-bis(4-fluoro)-[1,2,4]triazin-3-yl]-2,2'-bipyridine (11)

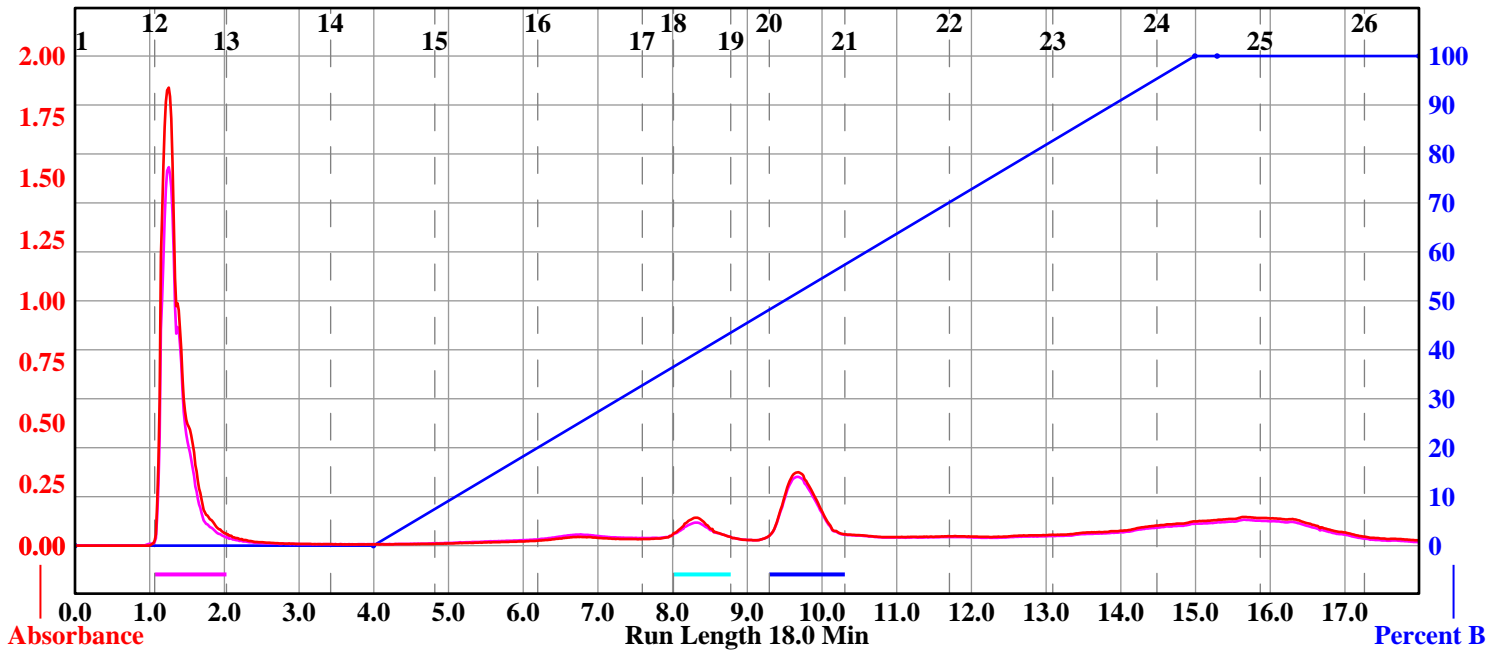

| Rack A |    |    |    |    |
|--------|----|----|----|----|
| 70     | 69 | 68 | 67 | 66 |
| 61     | 62 | 63 | 64 | 65 |
| 60     | 59 | 58 | 57 | 56 |
| 51     | 52 | 53 | 54 | 55 |
| 50     | 49 | 48 | 47 | 46 |
| 41     | 42 | 43 | 44 | 45 |
| 40     | 39 | 38 | 37 | 36 |
| 31     | 32 | 33 | 34 | 35 |
| 30     | 29 | 28 | 27 | 26 |
| 21     | 22 | 23 | 24 | 25 |
| 20     | 19 | 18 | 17 | 16 |
| 11     | 12 | 13 | 14 | 15 |
| 10     | 9  | 8  | 7  | 6  |
| 1      | 2  | 3  | 4  | 5  |

18 mm x 150 mm Tubes

| Peak # | Start Tube | End Tube |
|--------|------------|----------|
| 1      | A:12       | A:12     |
| 2      | A:18       | A:18     |
| 3      | A:20       | A:20     |

| Duration | %B    | Solvent A | Solvent B        |
|----------|-------|-----------|------------------|
| 0.0      | 0.0   | A1 hexane | B1 ethyl acetate |
| 4.0      | 0.0   | A1 hexane | B1 ethyl acetate |
| 11.0     | 100.0 | A1 hexane | B1 ethyl acetate |
| 0.3      | 100.0 | A1 hexane | B1 ethyl acetate |
| 2.7      | 100.0 | A1 hexane | B1 ethyl acetate |

**Figure S15.**

Sample: GDW-C-129-1

Rf 200

Monday 15 July 2019 04:57PM

RediSep Column: Silica 4g  
 Flow Rate: 18 ml/min  
 Equilibration Volume: 33.6 ml  
 Initial Waste: 0.0 ml  
 Air Purge: 0.5 min  
 Solvent: A2 dichloromethane  
 Solvent: B1 ethyl acetate

Peak Tube Volume: Max.  
 Non-Peak Tube Volume: Max.  
 Loading Type: Solid  
 Wavelength 1 (red): 254nm  
 Peak Width: 30 sec  
 Threshold: 0.20 AU  
 Wavelength 2 (purple): 280nm

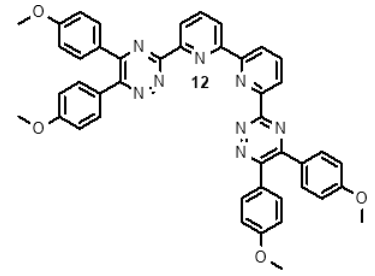

Run Notes: 6,6'-bis-[5,6-bis(4-methoxy)-[1,2,4]triazin-3-yl]-2,2'-bipyridine (12)

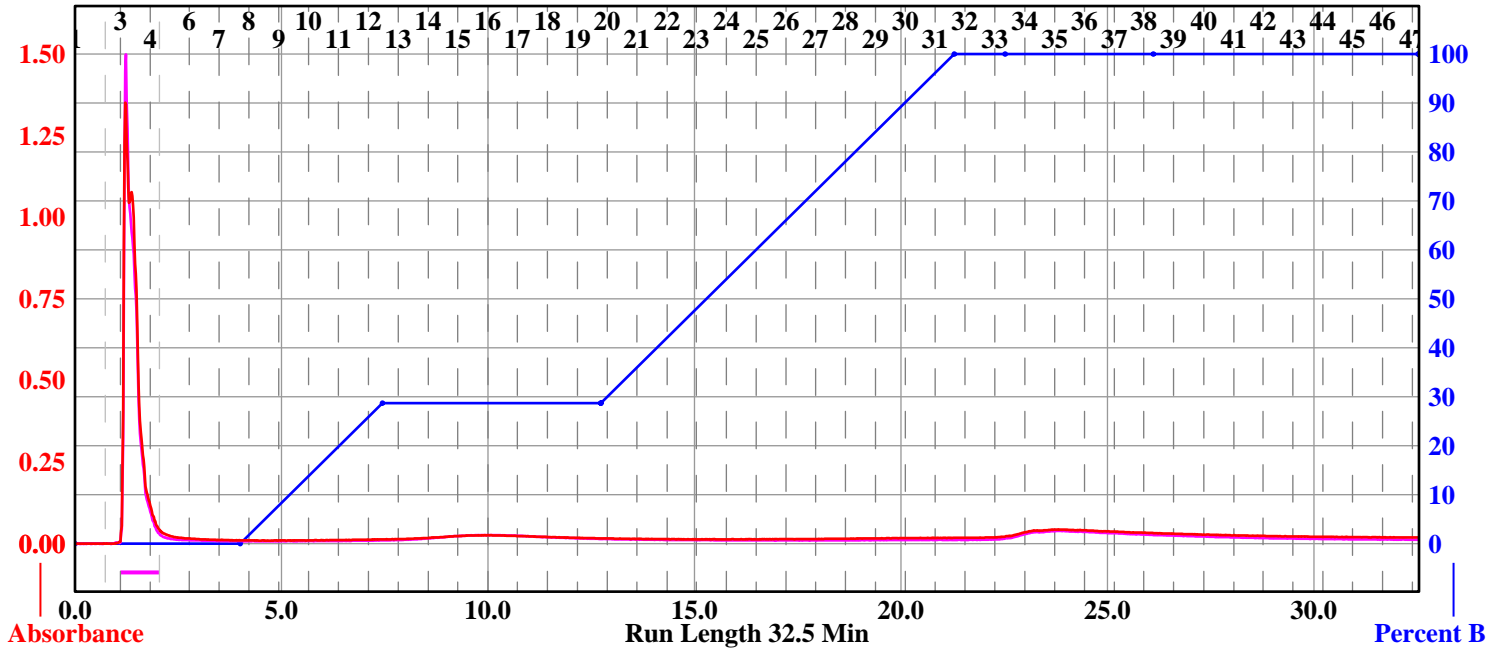

| Rack A |    |    |    |    |
|--------|----|----|----|----|
| 71     | 72 | 73 | 74 | 75 |
| 70     | 69 | 68 | 67 | 66 |
| 61     | 62 | 63 | 64 | 65 |
| 60     | 59 | 58 | 57 | 56 |
| 51     | 52 | 53 | 54 | 55 |
| 50     | 49 | 48 | 47 | 46 |
| 41     | 42 | 43 | 44 | 45 |
| 40     | 39 | 38 | 37 | 36 |
| 31     | 32 | 33 | 34 | 35 |
| 30     | 29 | 28 | 27 | 26 |
| 21     | 22 | 23 | 24 | 25 |
| 20     | 19 | 18 | 17 | 16 |
| 11     | 12 | 13 | 14 | 15 |
| 10     | 9  | 8  | 7  | 6  |
| 1      | 2  | 3  | 4  | 5  |

16 mm x 100 mm Tubes

| Peak # | Start Tube | End Tube |
|--------|------------|----------|
| 1      | A:3        | A:4      |

| Duration | %B    | Solvent A        | Solvent B        |
|----------|-------|------------------|------------------|
| 0.0      | 0.0   | A2 dichlorometha | B1 ethyl acetate |
| 4.0      | 0.0   | A2 dichlorometha | B1 ethyl acetate |
| 3.4      | 28.7  | A2 dichlorometha | B1 ethyl acetate |
| 5.3      | 28.7  | A2 dichlorometha | B1 ethyl acetate |
| 0.0      | 28.7  | A2 dichlorometha | B1 ethyl acetate |
| 8.6      | 100.0 | A2 dichlorometha | B1 ethyl acetate |
| 1.2      | 100.0 | A2 dichlorometha | B1 ethyl acetate |
| 3.6      | 100.0 | A2 dichlorometha | B1 ethyl acetate |
| 6.4      | 100.0 | A2 dichlorometha | B1 ethyl acetate |
| 0.0      | 100.0 | A2 dichlorometha | B1 ethyl acetate |



**Figure S16.**

Sample: GDW-C-229-1

Rf 200

Friday 30 August 2019 03:39PM

RediSep Column: Silica 4g  
 Flow Rate: 18 ml/min  
 Equilibration Volume: 33.6 ml  
 Initial Waste: 0.0 ml  
 Air Purge: 0.5 min  
 Solvent: A2 dichloromethane  
 Solvent: B1 ethyl acetate

Peak Tube Volume: Max.  
 Non-Peak Tube Volume: Max.  
 Loading Type: Solid  
 Wavelength 1 (red): 254nm  
 Peak Width: 30 sec  
 Threshold: 0.20 AU  
 Wavelength 2 (purple): 280nm

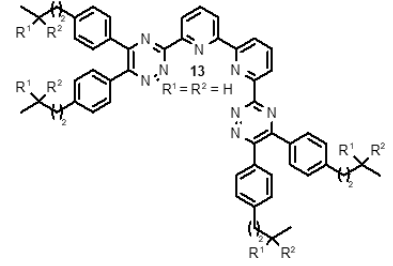

Run Notes: 6,6'-bis-[5,6-bis(4-butylphenyl)-[1,2,4]triazin-3-yl]-2,2'-bipyridine (13)

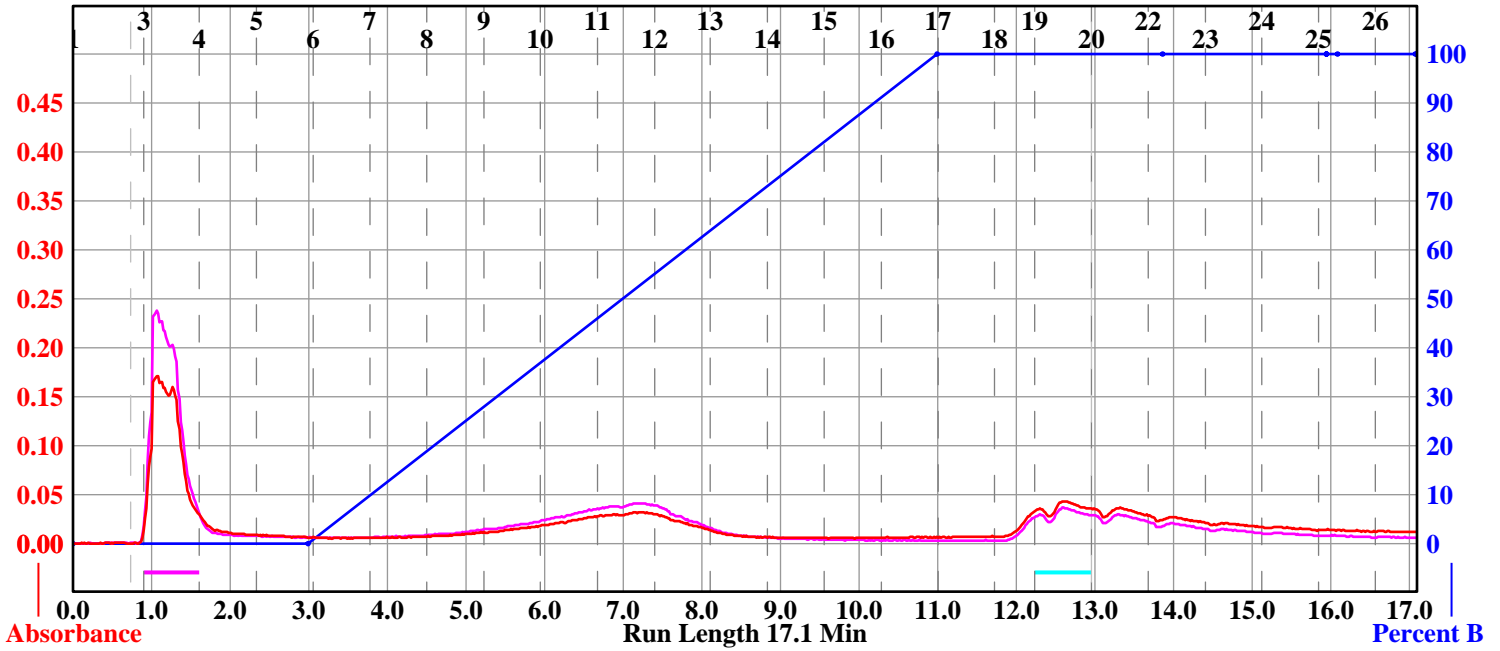

| Rack A |      |      |      |      | Peak # | Start Tube | End Tube |
|--------|------|------|------|------|--------|------------|----------|
| (71)   | (72) | (73) | (74) | (75) | 1      | A:3        | A:3      |
| (70)   | (69) | (68) | (67) | (66) | 2      | A:19       | A:20     |
| (61)   | (62) | (63) | (64) | (65) |        |            |          |
| (60)   | (59) | (58) | (57) | (56) |        |            |          |
| (51)   | (52) | (53) | (54) | (55) |        |            |          |
| (50)   | (49) | (48) | (47) | (46) |        |            |          |
| (41)   | (42) | (43) | (44) | (45) |        |            |          |
| (40)   | (39) | (38) | (37) | (36) |        |            |          |
| (31)   | (32) | (33) | (34) | (35) |        |            |          |
| (30)   | (29) | (28) | (27) | (26) |        |            |          |
| (21)   | (22) | (23) | (24) | (25) |        |            |          |
| (20)   | (19) | (18) | (17) | (16) |        |            |          |
| (11)   | (12) | (13) | (14) | (15) |        |            |          |
| (10)   | (9)  | (8)  | (7)  | (6)  |        |            |          |
| (1)    | (2)  | (3)  | (4)  | (5)  |        |            |          |

  

| Duration | %B    | Solvent A        | Solvent B        |
|----------|-------|------------------|------------------|
| 0.0      | 0.0   | A2 dichlorometha | B1 ethyl acetate |
| 3.0      | 0.0   | A2 dichlorometha | B1 ethyl acetate |
| 8.0      | 100.0 | A2 dichlorometha | B1 ethyl acetate |
| 2.9      | 100.0 | A2 dichlorometha | B1 ethyl acetate |
| 2.1      | 100.0 | A2 dichlorometha | B1 ethyl acetate |
| 0.0      | 100.0 | A2 dichlorometha | B1 ethyl acetate |
| 0.1      | 100.0 | A2 dichlorometha | B1 ethyl acetate |
| 1.0      | 100.0 | A2 dichlorometha | B1 ethyl acetate |
| 0.0      | 100.0 | A2 dichlorometha | B1 ethyl acetate |

16 mm x 100 mm Tubes

**Figure S17.**

Sample: GDW-C-139-1

Rf 200

Thursday 18 July 2019 04:29PM

RediSep Column: Silica 4g  
 Flow Rate: 18 ml/min  
 Equilibration Volume: 33.6 ml  
 Initial Waste: 0.0 ml  
 Air Purge: 0.5 min  
 Solvent: A2 dichloromethane  
 Solvent: B1 ethyl acetate

Peak Tube Volume: Max.  
 Non-Peak Tube Volume: Max.  
 Loading Type: Solid  
 Wavelength 1 (red): 254nm  
 Peak Width: 30 sec  
 Threshold: 0.20 AU  
 Wavelength 2 (purple): 280nm

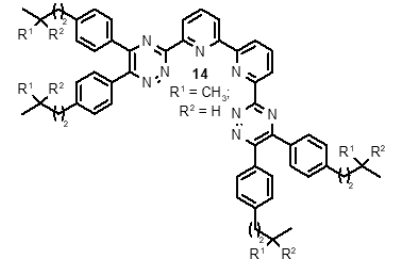

Run Notes: 6,6'-bis-[5,6-bis(4-(3-methylbutyl)phenyl)-[1,2,4]triazin-3-yl]-2,2'-bipyridine (14)

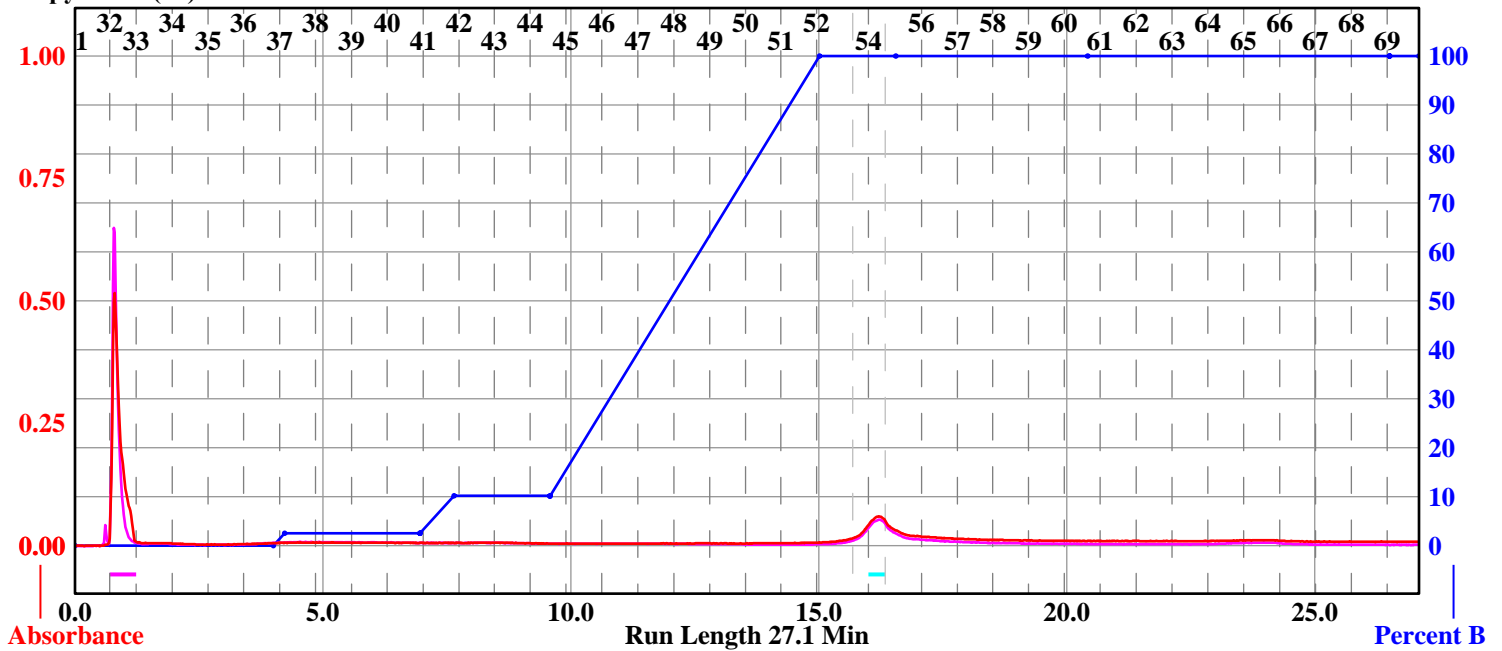

| Rack A |    |    |    |    |
|--------|----|----|----|----|
| 71     | 72 | 73 | 74 | 75 |
| 70     | 69 | 68 | 67 | 66 |
| 61     | 62 | 63 | 64 | 65 |
| 60     | 59 | 58 | 57 | 56 |
| 51     | 52 | 53 | 54 | 55 |
| 50     | 49 | 48 | 47 | 46 |
| 41     | 42 | 43 | 44 | 45 |
| 40     | 39 | 38 | 37 | 36 |
| 31     | 32 | 33 | 34 | 35 |
| 30     | 29 | 28 | 27 | 26 |
| 21     | 22 | 23 | 24 | 25 |
| 20     | 19 | 18 | 17 | 16 |
| 11     | 12 | 13 | 14 | 15 |
| 10     | 9  | 8  | 7  | 6  |
| 1      | 2  | 3  | 4  | 5  |

16 mm x 100 mm Tubes

| Peak # | Start Tube | End Tube |
|--------|------------|----------|
| 1      | A:32       | A:32     |
| 2      | A:54       | A:54     |

| Duration | %B    | Solvent A        | Solvent B        |
|----------|-------|------------------|------------------|
| 0.0      | 0.0   | A2 dichlorometha | B1 ethyl acetate |
| 4.0      | 0.0   | A2 dichlorometha | B1 ethyl acetate |
| 0.2      | 2.5   | A2 dichlorometha | B1 ethyl acetate |
| 2.7      | 2.5   | A2 dichlorometha | B1 ethyl acetate |
| 0.0      | 2.5   | A2 dichlorometha | B1 ethyl acetate |
| 0.7      | 10.2  | A2 dichlorometha | B1 ethyl acetate |
| 1.9      | 10.2  | A2 dichlorometha | B1 ethyl acetate |
| 0.0      | 10.1  | A2 dichlorometha | B1 ethyl acetate |
| 5.4      | 100.0 | A2 dichlorometha | B1 ethyl acetate |
| 1.5      | 100.0 | A2 dichlorometha | B1 ethyl acetate |
| ...      | ...   | ...              | ...              |

**Figure S18.**

Sample: GDW-B-197-1

Rf 200

Thursday 31 January 2019 01:53PM

4x Column: 3  
 RediSep Column: Silica 4g  
 Flow Rate: 18 ml/min  
 Equilibration Volume: 33.6 ml  
 Initial Waste: 0.0 ml  
 Air Purge: 0.5 min  
 Solvent: A1 hexane  
 Solvent: B1 ethyl acetate

Peak Tube Volume: Max.  
 Non-Peak Tube Volume: Max.  
 Loading Type: Solid  
 Wavelength 1 (red): 254nm  
 Peak Width: 30 sec  
 Threshold: 0.20 AU  
 Wavelength 2 (purple): 280nm

All Wavelength (orange): 200-300nm  
 Peak Width: 30 sec  
 Threshold: 0.20 AU

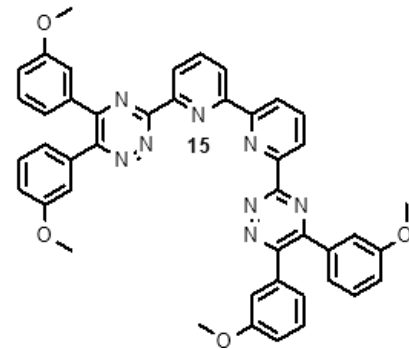

Run Notes: 6,6'-bis-[5,6-bis(3-methoxy)-[1,2,4]triazin-3-yl]-2,2'-bipyridine (15)

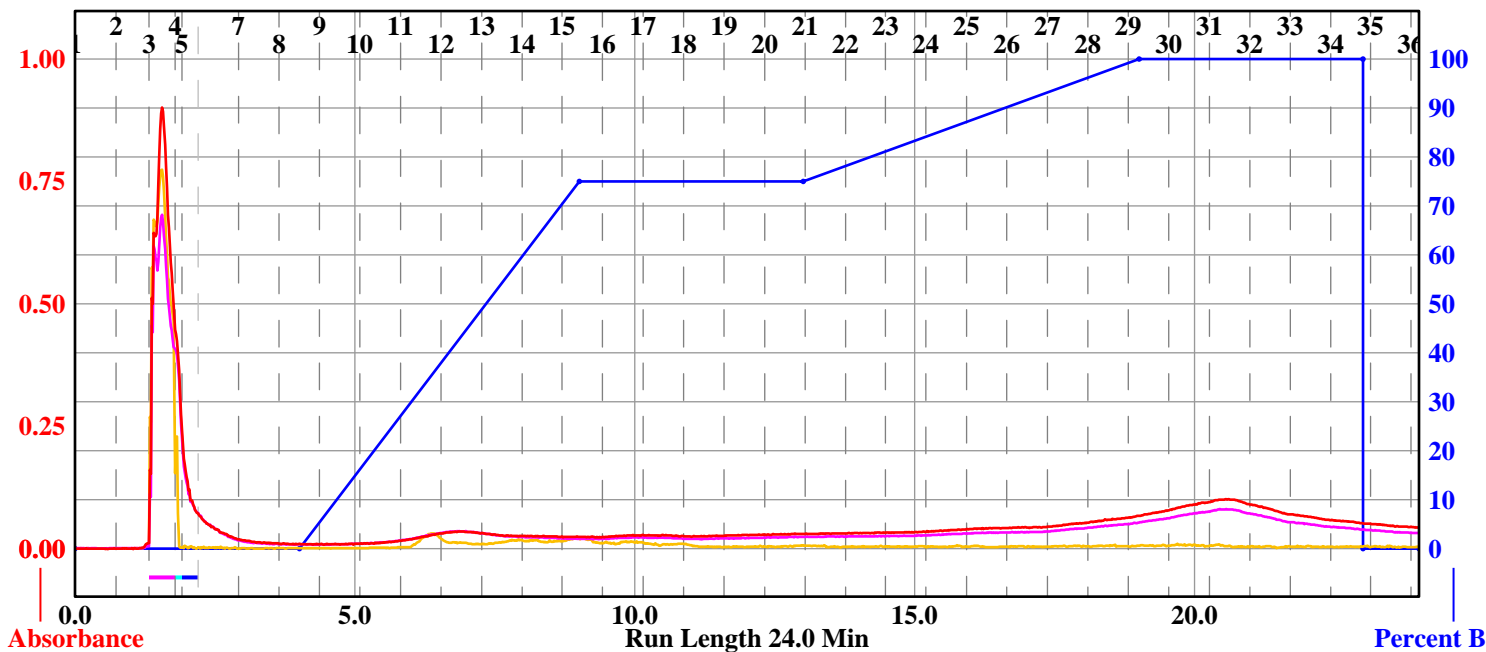

| Rack A |    |    |    |    |
|--------|----|----|----|----|
| 71     | 72 | 73 | 74 | 75 |
| 70     | 69 | 68 | 67 | 66 |
| 61     | 62 | 63 | 64 | 65 |
| 60     | 59 | 58 | 57 | 56 |
| 51     | 52 | 53 | 54 | 55 |
| 50     | 49 | 48 | 47 | 46 |
| 41     | 42 | 43 | 44 | 45 |
| 40     | 39 | 38 | 37 | 36 |
| 31     | 32 | 33 | 34 | 35 |
| 30     | 29 | 28 | 27 | 26 |
| 21     | 22 | 23 | 24 | 25 |
| 20     | 19 | 18 | 17 | 16 |
| 11     | 12 | 13 | 14 | 15 |
| 10     | 9  | 8  | 7  | 6  |
| 1      | 2  | 3  | 4  | 5  |

16 mm x 100 mm Tubes

| Peak # | Start Tube | End Tube |
|--------|------------|----------|
| 1      | A:3        | A:3      |
| 2      | A:4        | A:4      |
| 3      | A:5        | A:5      |

| Duration | %B    | Solvent A | Solvent B        |
|----------|-------|-----------|------------------|
| 0.0      | 0.0   | A1 hexane | B1 ethyl acetate |
| 4.0      | 0.0   | A1 hexane | B1 ethyl acetate |
| 5.0      | 75.0  | A1 hexane | B1 ethyl acetate |
| 4.0      | 75.0  | A1 hexane | B1 ethyl acetate |
| 6.0      | 100.0 | A1 hexane | B1 ethyl acetate |
| 4.0      | 100.0 | A1 hexane | B1 ethyl acetate |
| 0.0      | 0.0   | A1 hexane | B1 ethyl acetate |
| 1.0      | 0.0   | A1 hexane | B1 ethyl acetate |
